# Supplementary material
Source: ML conference proceedings conference paper supplement (https://proceedings.neurips.cc/paper_files/paper/2020/hash/52aaa62e71f829d41d74892a18a11d59-Abstract.html)
Supplement: Supplementary file [file 52aaa62e71f829d41d74892a18a11d59-Supplemental.zip]

293 In the appendix, we will give the proof of the main theorems. The appendix is organized as follows:

- 294 1. In section A, we list some notations used in the appendix.
- 295 2. In section B, we prove the two main theorems in one-block case.
- 296 3. In section C, we briefly state the proof of the two main theorems in multi-block setting.
- 297 4. In section D, we prove the two main error bound lemmas (Lemma 4.3 and Lemma 4.2)
- 298 under the strict complementarity assumption.
- 299 5. In section E, we see that the strict complementarity assumption can be relaxed to a weaker
- 300 regularity assumption. We also prove that this weaker regularity assumption is generic for
- 301 robust regression problems with square loss, i.e., we prove that our regularity assumption
- 302 holds with probability 1 if the data points are joint from a continuous distribution.
- 303 6. In the last section F, we give some more details about the experiment.

## 304 A Notations

305 We first list some notations which will be used in the appendix.

- 306 1.  $[m] = \{1, 2, \dots, m\}$ .
- 307 2.  $W^*$  is the solution set of (1.1) or (1.2).  $X^*$  is the set of all solutions  $x^*$ , i.e.,  $x^* \in X^*$  if
- 308 there exists a  $y^*$  such that  $(x^*, y^*) \in W^*$ .
- 309 3.  $\mathcal{B}(r)$  is a Euclidian ball of radius  $r$  for proper dimension.
- 310 4.  $\text{dist}(v, S)$  means the Euclidian distance from a point  $v$  to a set  $S$ .
- 311 5. For a vector  $v$ ,  $v_i$  means the  $i$ -th component of  $v$ . For a set  $\mathcal{S}$ ,  $v_{\mathcal{S}} \in \mathbb{R}^{|\mathcal{S}|}$  is the vector
- 312 containing all components  $v_i$ 's with  $i \in \mathcal{S}$ .
- 313 6. Let  $\mathbf{A} \in \mathbb{R}^{n \times m}$  be a matrix and  $\mathcal{S} \subseteq [m]$  be an index set. Then  $\mathbf{A}_{\mathcal{S}}$  represents the row
- 314 sub-matrix of  $A$  corresponding to the rows with index in  $\mathcal{S}$ .
- 315 7. For a matrix  $\mathbf{M}$ ,  $\gamma(\mathbf{M})$  is the smallest singular value of  $\mathbf{M}$ .
- 316 8. The projection of a point  $y$ , onto a set  $X$  is defined as  $P_X(y) = \arg\min_{x \in X} \frac{1}{2} \|x - y\|^2$ .

## 317 B Proof of the two main theorems: one-block case

318 In this section, we prove the two main theorems in one-block case. The proof of the multi-block

319 case is similar and will be given in the next section.

### 320 Proof Sketch.

- 321 • In Step 1, we will introduce the potential function  $\phi^t$  which is shown to be bounded below.
- 322 To obtain the convergence rate of the algorithms, we want to prove the potential function
- 323 can make sufficient decrease at every iterate  $t$ , i.e., we want to show  $\phi^t - \phi^{t+1} > 0$ .
- 324 • In Step 2, we will study this difference  $\phi^t - \phi^{t+1}$  and provide a lower bound of it in
- 325 Proposition 4.2. Notice that a negative term (4.3) will show up in the lower bound, and we
- 326 have to carefully analyze the magnitude of this term to obtain  $\phi^t - \phi^{t+1} > 0$ .
- 327 • Analyzing the negative term will be the main difficulty of the proof. In Step 3, we will
- 328 discuss how to deal with this difficulty for solving Problem 1.1 and Problem 1.2 separately.
- 329 • Finally, we will show the potential function makes a sufficient decrease at every iterate
- 330 as stated in (4.4), and will conclude our proof by computing the number of iterations to
- 331 achieve an  $\epsilon$ -solution in Lemma B.12.

### 332 B.1 The potential function and basic estimate

Recall that the potential function is:

$$\phi^t = \Phi(x^t, z^t; y^t) = K(x^t, z^t; y^t) - 2d(y^t, z^t) + 2P(z^t),$$

333 where

$$\begin{aligned} K(x, z; y) &= f(x, y) + \frac{p}{2} \|x - z\|^2, \\ d(y, z) &= \min_{x \in X} K(x, z; y), \\ P(z) &= \min_{x \in X} \max_{y \in Y} K(x, z; y). \end{aligned}$$

334 Also note that if  $p > L$ ,  $K(x, z; y)$  is strongly convex of  $x$  with modular  $p - L$  and  $\nabla_x K(x, z; y)$  is  
335 Lipschitz-continuous of  $x$  with a constant  $L + p$ . We also use the following notations:

- 336 1.  $h(x, z) = \max_{y \in Y} K(x, z; y)$ .
- 337 2.  $x(y, z) = \arg \min_{x \in X} K(x, z; y)$ ,  $x^*(z) = \arg \min_{x \in X} h(x, z)$ .
- 338 3. The set  $Y(z) = \arg \max_{y \in Y} d(y, z)$ .
- 339 4.  $y_+(z) = P_Y(y + \alpha \nabla_y K(x(y, z), z; y))$ .
- 340 5.  $x_+(y, z) = P_X(x - c \nabla_x K(x, z; y))$ .

341 First of all, we can prove that  $\phi^t$  is bounded from below:

**Lemma B.1** *We have*

$$\phi(x, y, z) \geq \underline{f}.$$

342 **Proof** By the definition of  $d(\cdot)$  and  $P(\cdot)$ , we have

$$K(x, z; y) \geq d(y, z), \quad P(z) \geq d(y, z), \quad , P(z) \geq \underline{f}. \quad (\text{B.1})$$

343 Hence, we have

$$\begin{aligned} \phi(x, y, z) &= P(z) + (K(x, z; y) - d(y, z)) + (P(z) - d(y, z)) \\ &\geq P(z) \\ &\geq \underline{f}. \end{aligned}$$

344

■

345 Next, we state some “error bounds”.

346 **Lemma B.2** *There exist constants  $\sigma_1, \sigma_2, \sigma_3$  independent of  $y$  such that*

$$\|x(y, z) - x(y, z')\| \leq \sigma_1 \|z - z'\|, \quad (\text{B.2})$$

$$\|x^*(z) - x^*(z')\| \leq \sigma_1 \|z - z'\|, \quad (\text{B.3})$$

$$\|x(y, z) - x(y', z)\| \leq \sigma_2 \|y - y'\|, \quad (\text{B.4})$$

$$\|x^{t+1} - x(y^t, z^t)\| \leq \sigma_3 \|x^t - x^{t+1}\|, \quad (\text{B.5})$$

347 for any  $y, y' \in Y$  and  $z, z' \in X$ , where  $\sigma_1 = \frac{p}{-L+p}$ ,  $\sigma_2 = \frac{2(p+L)}{p-L}$ ,  $\sigma_3 = \frac{1+(c(-L+p))}{c(-L+p)}..$

348 **Proof** The proofs of (B.2), (B.3) and (B.5) are the same as those in Lemma 3.6 in [29] and hence  
349 omitted. We only need to prove (B.4). Using the strong convexity of  $K(\cdot, z; y)$  of  $x$ , we have

$$K(x(y, z), z; y) - K(x(y', z), z; y) \leq -\frac{-L+p}{2} \|x(y, z) - x(y', z)\|^2, \quad (\text{B.6})$$

$$K(x(y, z), z; y') - K(x(y', z), z; y') \geq \frac{-L+p}{2} \|x(y, z) - x(y', z)\|^2. \quad (\text{B.7})$$

350 Moreover, using the concavity of  $K(x, z; \cdot)$  of  $y$ , we have

$$\begin{aligned} &K(x(y, z), z; y') - K(x(y, z), z; y) \\ &\leq \langle \nabla_y K(x(y, z), z; y), y' - y \rangle. \end{aligned} \quad (\text{B.8})$$

351 Using the Lipschitz-continuity of  $\nabla_y K(x, z; \cdot)$ , we have

$$\begin{aligned} &K(x(y', z), z; y) - K(x(y', z), z; y') \\ &\leq \langle \nabla_y K(x(y', z), z; y), y' - y \rangle + \frac{L}{2} \|y - y'\|^2. \end{aligned} \quad (\text{B.9})$$

352 Combining (B.6) and (B.9), we have

$$(-L + p)\|x(y, z) - x(y', z)\|^2 \quad (\text{B.10})$$

$$\leq \langle \nabla_y K(x(y, z), z; y) - \nabla_y K(x(y', z), z; y), y' - y \rangle + \frac{L}{2}\|y - y'\|^2 \quad (\text{B.11})$$

$$\leq (p + L)\|x(y', z) - x(y, z)\|\|y - y'\| + \frac{L}{2}\|y - y'\|^2, \quad (\text{B.12})$$

353 where the last inequality uses the Cauchy-schwarz inequality and the Lipschitz-continuity of  
354  $\nabla_x K(\cdot, z; y)$  of  $x$ .

Let  $\zeta = \|x(y, z) - x(y', z)\|/\|y - y'\|$ . Then (B.10) becomes

$$\zeta^2 \leq \frac{p + L}{p - L}\zeta + \frac{L}{2(p - L)}.$$

355 Hence, we only need to solve the above quadratic inequality. We have

$$\begin{aligned} \zeta^2 &\leq \frac{1}{2}\zeta^2 + \frac{1}{2}\left(\frac{p + L}{p - L}\right)^2 + \frac{L}{2(p - L)} \\ &\leq \frac{1}{2}\zeta^2 + \frac{1}{2}\left(\frac{p + L}{p - L}\right)^2 + \frac{p + L}{2(p - L)} \\ &\leq \frac{1}{2}\zeta^2 + \frac{1}{2}\left(\frac{p + L}{p - L}\right)^2 + \frac{1}{2}\left(\frac{p + L}{p - L}\right)^2 \\ &= \frac{1}{2}\zeta^2 + \left(\frac{p + L}{p - L}\right)^2, \end{aligned}$$

where the first inequality is due to the AM-GM inequality and the third inequality is because  $(p + L)/(p - L) > 1$ . Therefore

$$\zeta \leq \sqrt{2}\frac{p + L}{p - L} < 2\frac{p + L}{p - L}.$$

356 Hence, we can take  $\sigma_2 = 2(p + L)/(p - L)$  and finish the proof. ■

357 The following lemma is a direct corollary of the above lemma:

**Lemma B.3** *The dual function  $d(\cdot, z)$  is a differentiable function of  $y$  with Lipschitz continuous gradient*

$$\nabla_y d(y, z) = \nabla_y K(x(y, z), z; y) = \nabla_y f(x(y, z), y)$$

358 and

$$\|\nabla_y d(y', z) - \nabla_y d(y'', z)\| \leq L_d \|y' - y''\|, \quad \forall y', y'' \in Y.$$

359 with  $L_d = L + L\sigma_2$ .

360 **Remark.** Note that if  $p \geq 3L$ , then we have  $\sigma_2 = 2(p + L)/(p - L) \geq 4L$  and hence

$$L_d \geq 5L. \quad (\text{B.13})$$

**Proof** Using Danskin's theorem in convex analysis [39], we know that  $d$  is a differentiable function with

$$\nabla_y d(y, z) = \nabla_y K(x(y, z), z; y) = \nabla_y f(x(y, z), y).$$

361 To prove the Lipschitz-continuity, we have

$$\begin{aligned} \|\nabla_y d(y', z) - \nabla_y d(y'', z)\| &= \|\nabla_y K(x(y', z), z; y') - \nabla_y K(x(y'', z), z; y'')\| \\ &\leq \|\nabla_y K(x(y', z), z; y') - \nabla_y K(x(y', z), z; y'')\| \\ &\quad + \|\nabla_y K(x(y', z), z; y'') - \nabla_y K(x(y'', z), z; y'')\| \\ &\leq L\|y' - y''\| + L\|x(y', z) - x(y'', z)\| \\ &\leq L\|y' - y''\| + L\sigma_2\|y' - y''\| = L_d\|y' - y''\|, \end{aligned}$$

362 where the last inequality is due to Lemma B.2. ■

363 We then prove the following basic estimate.

364 **Proposition B.4** We let

$$p > 3L, c < \frac{1}{p+L}, \alpha < \min\left\{\frac{1}{11L}, \frac{1}{4L\sigma_3^2}\right\} = \min\left\{\frac{1}{11L}, \frac{c^2(p-L)^2}{4L(1+c(p-L))^2}\right\}, \beta < \min\left\{\frac{1}{20}, \frac{(p-L)^2}{384p(p+L)^2}\right\}. \quad (\text{B.14})$$

365 Then we have

$$\begin{aligned} & \phi^t - \phi^{t+1} \\ & \geq \frac{1}{8c} \|x^t - x^{t+1}\|^2 \end{aligned} \quad (\text{B.15})$$

$$+ \frac{1}{8\alpha} \|y^t - y_+^t(z^t)\|^2 + \frac{p}{8\beta} \|z^t - z^{t+1}\|^2 \quad (\text{B.16})$$

$$- 24p\beta \|x^*(z^t) - x(y_+^t(z^t), z^t)\|^2 \quad (\text{B.17})$$

366 To prove this basic estimate, we need a series of lemmas.

367 **Lemma B.5 (Primal Descent)** For any  $t$ , we have

$$\begin{aligned} K(x^t, z^t; y^t) - K(x^{t+1}, z^{t+1}; y^{t+1}) & \geq \frac{1}{2c} \|x^t - x^{t+1}\|^2 + \langle \nabla_y K(x^{t+1}, z^t; y^t), y^t - y^{t+1} \rangle \\ & \quad - \frac{L}{2} \|y^t - y^{t+1}\|^2 + \frac{p}{2\beta} \|z^t - z^{t+1}\|^2. \end{aligned} \quad (\text{B.18})$$

368 **Proof** Notice that the step of updating  $x$  is a standard gradient projection, hence we have

$$K(x^t, z^t; y^t) - K(x^{t+1}, z^t; y^t) \geq \frac{1}{2c} \|x^t - x^{t+1}\|^2. \quad (\text{B.19})$$

369 Next, because  $\nabla_y K(x, z; y)$  is  $L$ -Lipschitz-continuous of  $y$ , we have

$$K(x^{t+1}, z^t; y^t) - K(x^{t+1}, z^t; y^{t+1}) \geq \langle \nabla_y K(x^{t+1}, z^t; y^t), y^t - y^{t+1} \rangle - \frac{L}{2} \|y^t - y^{t+1}\|^2. \quad (\text{B.20})$$

370 Based on the update of variable  $z^{t+1}$ , i.e.  $z^{t+1} = z^t + \beta(x^{t+1} - z^t)$ , it is easy to show that

$$K(x^{t+1}, z^t; y^{t+1}) - K(x^{t+1}, z^{t+1}; y^{t+1}) \geq \frac{p}{2\beta} \|z^t - z^{t+1}\|^2.$$

371 Combining (B.19)-(B.21), we finish the proof. ■

372 **Lemma B.6 (Dual Ascent)** For any  $t$ , we have

$$\begin{aligned} d(y^{t+1}, z^{t+1}) - d(y^t, z^t) & \geq \langle \nabla_y d(y^t, z^t), y^{t+1} - y^t \rangle - \frac{L_d}{2} \|y^t - y^{t+1}\|^2 \\ & \quad + \frac{p}{2} (z^{t+1} - z^t)^T (z^{t+1} + z^t - 2x(y^{t+1}, z^{t+1})) \end{aligned} \quad (\text{B.21})$$

$$= \langle \nabla_y K(x(y^t, z^t), z^t; y^t), y^{t+1} - y^t \rangle - \frac{L_d}{2} \|y^t - y^{t+1}\|^2 \quad (\text{B.22})$$

$$+ \frac{p}{2} (z^{t+1} - z^t)^T (z^{t+1} + z^t - 2x(y^{t+1}, z^{t+1})) \quad (\text{B.23})$$

373 **Proof** Using Lemma B.3, we have

$$\begin{aligned} -d(y^{t+1}, z^t) - (-d(y^t, z^t)) & \leq -\langle \nabla_y d(y^t, z^t), y^{t+1} - y^t \rangle + \frac{L_d}{2} \|y^t - y^{t+1}\|^2 \\ & = -\langle \nabla_y K(x^{t+1}, z^t; y^t), y^{t+1} - y^t \rangle + \frac{L_d}{2} \|y^t - y^{t+1}\|^2 \end{aligned} \quad (\text{B.24})$$

374 Next,

$$\begin{aligned} & d(y^{t+1}, z^{t+1}) - d(y^{t+1}, z^t) \\ & = K(x(y^{t+1}, z^{t+1}), z^{t+1}; y^{t+1}) - K(x(y^{t+1}, z^t), z^t; y^{t+1}) \\ & \geq K(x(y^{t+1}, z^{t+1}), z^{t+1}; y^{t+1}) - K(x(y^{t+1}, z^{t+1}), z^t; y^{t+1}) \\ & = \frac{p}{2} \|x(y^{t+1}, z^{t+1}) - z^{t+1}\|^2 - \frac{p}{2} \|x(y^{t+1}, z^{t+1}) - z^t\|^2 \\ & = \frac{p}{2} (z^{t+1} - z^t)^T (z^{t+1} + z^t - 2x(y^{t+1}, z^{t+1})). \end{aligned} \quad (\text{B.25})$$

375 Finally, using (B.24)-(B.25) we finish the proof. ■

Recall that

$$Y(z) = \{y \in Y \mid \arg \max_{y \in Y} d(y, z)\}$$

Note that

$$P(z) = d(y(z), z),$$

376 for any  $y(z) \in Y(z)$ .

377 **Lemma B.7 (Proximal Descent)** *For any  $t \geq 0$ , there holds*

$$P(z^{t+1}) - P(z^t) \leq \frac{p}{2}(z^{t+1} - z^t)^T(z^t + z^{t+1} - 2x(y(z^{t+1}), z^t)), \quad (\text{B.26})$$

378 where  $y(z^{t+1})$  is arbitrary  $y$  belongs to the set  $Y(z^{t+1})$ .

**Proof** In the rest of the Appendix,  $y(z^{t+1})$  denote any  $y$  belongs to the set  $Y(z^{t+1})$ . Using Kakutani's Theorem, we have

$$\min_{x \in X} \max_{y \in Y} K(x, z; y) = \max_{y \in Y} \min_{x \in X} K(x, z; y),$$

which implies

$$\max_{y \in Y} d(y, z) = \min_{x \in X} h(x, z) = P(z).$$

379 Hence we have

$$\begin{aligned} & P(z^{t+1}) - P(z^t) \\ & \stackrel{(i)}{\leq} P(z^{t+1}) - d(y(z^{t+1}), z^t) \\ & \stackrel{(ii)}{=} d(y(z^{t+1}), z^{t+1}) - d(y(z^{t+1}), z^t) \\ & \stackrel{(iii)}{=} K(x(y(z^{t+1}), z^t), z^{t+1}; y(z^{t+1})) - K(x(y(z^{t+1}), z^t), z^t; y(z^{t+1})) \\ & \stackrel{(iv)}{=} \frac{p}{2}(z^{t+1} - z^t)^T(z^{t+1} + z^t - 2x(y(z^{t+1}), z^t)), \end{aligned}$$

380 where (i) and (iii) are because of (B.1), (ii) is because of the definition of  $y(z^{t+1})$  and (iv) is from  
381 direct calculation. ■

**Lemma B.8**  $x^*(z) = x(y, z)$  for any  $y \in Y(z)$  and  $x^*(z)$  is continuous of  $z$ . Moreover, we have

$$z = x^*(z)$$

382 if and only if  $z \in X^*$ .

We define

$$y_+(z) = P_Y(y + \alpha \nabla_y K(x(y, z), z; y)).$$

383 Then we have

**Lemma B.9** *We have*

$$\|y^{t+1} - y_+^t(z^t)\| \leq \kappa \|x^t - x^{t+1}\|,$$

384 where  $\kappa = \alpha L \sigma_3$ .

385 **Proof** By the nonexpansiveness of the projection operator, we have

$$\begin{aligned} \|y^{t+1} - y_+^t(z^t)\| &= \|P_Y(y^t + \alpha \nabla_y K(x(y^t, z^t), z^t; y^t)) - P_Y(y^t + \alpha \nabla_y K(x^{t+1}, z^t; y^t))\| \\ &\leq \|(y^t + \alpha \nabla_y K(x(y^t, z^t), z^t; y^t)) - (y^t + \alpha \nabla_y K(x^{t+1}, z^t; y^t))\| \\ &\leq \alpha L \|x^{t+1} - x(y^t, z^t)\| \\ &\leq \alpha L \sigma_3 \|x^t - x^{t+1}\|, \end{aligned}$$

386 where the first inequality is due to the nonexpansiveness of the projection operator, the second is  
387 because of the Lipschitz-continuity of  $\nabla_y K$  and the last inequality is because of (B.5). ■

388 Now we can prove Proposition B.4.

389 **Proof** Using the three descent lemma, we have

$$\begin{aligned}
& \Phi^t - \Phi^{t+1} \\
& \geq \frac{1}{2c} \|x^t - x^{t+1}\|^2 + \langle \nabla_y K(x^{t+1}, z^t; y^t), y^t - y^{t+1} \rangle - \frac{L}{2} \|y^t - y^{t+1}\|^2 + \frac{p}{2\beta} \|z^t - z^{t+1}\|^2 \\
& \quad + 2\langle \nabla_y K(x(y^t, z^t), z^t; y^t), y^{t+1} - y^t \rangle - \frac{2L_d}{2} \|y^t - y^{t+1}\|^2 + p(z^{t+1} - z^t)^T (z^{t+1} + z^t - 2x(y^{t+1}, z^{t+1})) \\
& \quad - p(z^{t+1} - z^t)^T (z^t + z^{t+1} - 2x(y(z^{t+1}), z^t)) \\
& = \frac{1}{2c} \|x^t - x^{t+1}\|^2 - \frac{L + 2L_d}{2} \|y^t - y^{t+1}\|^2 + \frac{p}{2\beta} \|z^t - z^{t+1}\|^2 + \langle \nabla_y K(x^{t+1}, z^t; y^t), y^{t+1} - y^t \rangle \\
& \quad + 2\langle \nabla_y K(x(y^t, z^t), z^t; y^t) - \nabla_y K(x^{t+1}, z^t; y^t), y^{t+1} - y^t \rangle \\
& \quad + 2p(z^{t+1} - z^t)^T (x(y(z^{t+1}), z^t) - x(y^{t+1}, z^{t+1})).
\end{aligned} \tag{B.27}$$

390 Using the property of the projection operator and the update of the dual variable  $y^t$ , we have

$$\langle \nabla_y K(x^{t+1}, z^t; y^t), y^{t+1} - y^t \rangle \geq \frac{1}{\alpha} \|y^t - y^{t+1}\|^2.$$

391 Substituting the above inequality into (B.27), we get

$$\begin{aligned}
& \Phi^t - \Phi^{t+1} \\
& \geq \frac{1}{2c} \|x^t - x^{t+1}\|^2 + \left(\frac{1}{\alpha} - \frac{L + 2L_d}{2}\right) \|y^t - y^{t+1}\|^2 + \frac{p}{2\beta} \|z^t - z^{t+1}\|^2 \\
& \quad + 2\langle \nabla_y K(x(y^t, z^t), z^t; y^t) - \nabla_y K(x^{t+1}, z^t; y^t), y^{t+1} - y^t \rangle \\
& \quad + 2p(z^{t+1} - z^t)^T (x(y(z^{t+1}), z^t) - x(y^{t+1}, z^{t+1})) \\
& \geq \frac{1}{2c} \|x^t - x^{t+1}\|^2 + \left(\frac{1}{\alpha} - \frac{L + 10L}{2}\right) \|y^t - y^{t+1}\|^2 + \frac{p}{2\beta} \|z^t - z^{t+1}\|^2 \\
& \quad + 2\langle \nabla_y K(x(y^t, z^t), z^t; y^t) - \nabla_y K(x^{t+1}, z^t; y^t), y^{t+1} - y^t \rangle \\
& \quad + 2p(z^{t+1} - z^t)^T (x(y(z^{t+1}), z^t) - x(y^{t+1}, z^{t+1})) \\
& \geq \frac{1}{2c} \|x^t - x^{t+1}\|^2 + \frac{1}{2\alpha} \|y^t - y^{t+1}\|^2 + \frac{p}{2\beta} \|z^t - z^{t+1}\|^2 \\
& \quad + 2\langle \nabla_y K(x(y^t, z^t), z^t; y^t) - \nabla_y K(x^{t+1}, z^t; y^t), y^{t+1} - y^t \rangle \\
& \quad + 2p(z^{t+1} - z^t)^T (x(y(z^{t+1}), z^t) - x(y^{t+1}, z^{t+1}))
\end{aligned}$$

392 where the second inequality is because of (B.13) and the last inequality is because  $\alpha \leq \frac{1}{11L}$ .

393 Notice that

$$\begin{aligned}
& 2p(z^{t+1} - z^t)^T (x(y(z^{t+1}), z^t) - x(y^{t+1}, z^{t+1})) \\
& = 2p(z^{t+1} - z^t)^T ((x(y(z^{t+1}), z^t) - x(y(z^{t+1}), z^{t+1})) + (x(y(z^{t+1}), z^{t+1}) - x(y^{t+1}, z^{t+1}))) \\
& = 2p(z^{t+1} - z^t)^T (x(y(z^{t+1}), z^t) - x(y(z^{t+1}), z^{t+1})) \\
& \quad + 2p(z^{t+1} - z^t)^T (x(y(z^{t+1}), z^{t+1}) - x(y^{t+1}, z^{t+1})) \\
& \stackrel{(i)}{\geq} -2p\sigma_1 \|z^{t+1} - z^t\|^2 + 2p(z^{t+1} - z^t)^T (x(y(z^{t+1}), z^{t+1}) - x(y^{t+1}, z^{t+1})) \\
& \stackrel{(ii)}{\geq} -2p\sigma_1 \|z^{t+1} - z^t\|^2 - \frac{p}{6\beta} \|z^{t+1} - z^t\|^2 - 6p\beta \|x(y(z^{t+1}), z^{t+1}) - x(y^{t+1}, z^{t+1})\|^2,
\end{aligned}$$

394 where (i) is because of the Cauchy-Schwarz inequality and Lemma B.2 and (ii) is due to the AM-GM  
395 inequality. Also we have

$$\begin{aligned}
& 2\langle \nabla_y K(x(y^t, z^t), z^t; y^t) - \nabla_y K(x^{t+1}, z^t; y^t), y^{t+1} - y^t \rangle \\
& \geq -2\|\nabla_y K(x(y^t, z^t), z^t; y^t) - \nabla_y K(x^{t+1}, z^t; y^t)\| \cdot \|y^{t+1} - y^t\| \\
& \geq -2L\|x^{t+1} - x(y^t, z^t)\| \cdot \|y^t - y^{t+1}\| \\
& \geq -L\sigma_3^2 \|y^t - y^{t+1}\|^2 - L\sigma_3^{-2} \|x^{t+1} - x(y^t, z^t)\|^2 \\
& \geq -L\sigma_3^2 \|y^t - y^{t+1}\|^2 - L\|x^{t+1} - x^t\|^2,
\end{aligned}$$

where the first inequality is because of the Cauchy-Schwarz inequality, the second inequality is because  $\nabla_y K = \nabla_y f$  is  $L$ -Lipschitz-continuous, the third inequality is due to the AM-GM inequality and the last is because of (B.5).

Hence we have

$$\begin{aligned} & \Phi^t - \Phi^{t+1} \\ & \geq \left(\frac{1}{2c} - L\right)\|x^t - x^{t+1}\|^2 + \left(\frac{1}{2\alpha} - L\sigma_3^2\right)\|y^t - y^{t+1}\|^2 + \left(\frac{p}{2\beta} - 2p\sigma_1 - \frac{p}{6\beta}\right)\|z^t - z^{t+1}\|^2 \\ & \quad - 6p\beta\|x(y(z^{t+1}), z^{t+1}) - x(y^{t+1}, z^{t+1})\|^2 \end{aligned}$$

By the conditions of  $p, c$ , we have

$$1/2c - L \geq 1/4c.$$

By the condition for  $\alpha$ , we have

$$\alpha < 1/(4L\sigma_3^2),$$

which yields

$$1/(2\alpha) - L\sigma_3^2 \geq 1/(4\alpha)$$

And by the conditions that  $\beta < \frac{1}{20}$  and  $p \geq 3L$  together with the definition of  $\sigma_1$ ,

$$\frac{p}{2\beta} - 2p\sigma_1 - \frac{p}{6\beta} \geq \frac{p}{4\beta}.$$

Then we have

$$\begin{aligned} & \Phi^t - \Phi^{t+1} \\ & \geq \frac{1}{4c}\|x^t - x^{t+1}\|^2 + \frac{1}{4\alpha}\|y^t - y^{t+1}\|^2 + \frac{p}{4\beta}\|z^t - z^{t+1}\|^2 \\ & \quad - 6p\beta\|x(y(z^{t+1}), z^{t+1}) - x(y^{t+1}, z^{t+1})\|^2 \end{aligned} \tag{B.29}$$

$$\begin{aligned} & = \frac{1}{4c}\|x^t - x^{t+1}\|^2 + \frac{1}{4\alpha}\|y^t - y^{t+1}\|^2 + \frac{p}{4\beta}\|z^t - z^{t+1}\|^2 \\ & \quad - 6p\beta\|x^*(z^{t+1}) - x(y^{t+1}, z^{t+1})\|^2, \end{aligned} \tag{B.30}$$

where the last equality is because of Lemma B.8. By Lemma B.9 and the convexity of the norm square function, we have

$$\|y^{t+1} - y^t\|^2 = \|(y^{t+1} - y_+^t(z^t)) + (y_+^t(z^t) - y^t)\|^2 \tag{B.31}$$

$$\geq \|y^t - y_+^t(z^t)\|^2/2 - \|y^{t+1} - y_+^t(z^t)\|^2 \tag{B.32}$$

$$\geq \|y^t - y_+^t(z^t)\|^2/2 - \kappa^2\|x^t - x^{t+1}\|^2. \tag{B.33}$$

Similarly, by Lemma B.9, (B.4) and the convexity of norm square function, we have

$$\|x^*(z^{t+1}) - x(y^{t+1}, z^{t+1})\|^2 \tag{B.34}$$

$$= \|(x^*(z^{t+1}) - x^*(z^t)) + (x^*(z^t) - x(y_+^t(z^t), z^t))\|^2 \tag{B.35}$$

$$+ \|(x(y_+^t(z^t), z^t) - x(y^{t+1}, z^t)) + (x(y^{t+1}, z^t) - x(y^{t+1}, z^{t+1}))\|^2 \tag{B.36}$$

$$\leq 4\|x^*(z^{t+1}) - x^*(z^t)\|^2 + 4\|x^*(z^t) - x(y_+^t(z^t), z^t)\|^2 \tag{B.37}$$

$$+ 4\|x(y_+^t(z^t), z^t) - x(y^{t+1}, z^t)\|^2 + 4\|x(y^{t+1}, z^t) - x(y^{t+1}, z^{t+1})\|^2 \tag{B.38}$$

$$\leq 4\sigma_1^2\|z^t - z^{t+1}\|^2 + 4\|x^*(z^t) - x(y_+^t(z^t), z^t)\|^2 \tag{B.39}$$

$$+ 4\sigma_2^2\kappa^2\|x^t - x^{t+1}\|^2 + 4\sigma_1^2\|z^t - z^{t+1}\|^2 \tag{B.40}$$

$$= 8\sigma_1^2\|z^t - z^{t+1}\|^2 + 4\|x^*(z^t) - x(y_+^t(z^t), z^t)\|^2 \tag{B.41}$$

$$+ 4\sigma_2^2\kappa^2\|x^t - x^{t+1}\|^2. \tag{B.42}$$

Substituting (B.31) and (B.34) to (B.29) yields

$$\begin{aligned} & \phi^t - \phi^{t+1} \\ & \geq \left(\frac{1}{4c} - 24p\beta\sigma_2^2\kappa^2 - \kappa^2/(4\alpha)\right)\|x^t - x^{t+1}\|^2 \\ & \quad + \frac{1}{8\alpha}\|y^t - y_+^t(z^t)\|^2 + \left(\frac{p}{4\beta} - 48p\beta\sigma_1^2\right)\|z^t - z^{t+1}\|^2 \\ & \quad - 24p\beta\|x^*(z^t) - x(y_+^t(z^t), z^t)\|^2. \end{aligned}$$

Notice that

$$\alpha < 1/(4L\sigma_3^2) < 1/(4cL^2\sigma_3^2),$$

and hence  $\kappa^2/(4\alpha) = \alpha^2 L^2 \sigma_3^2/(4\alpha) < 1/(16c)$ . Also we have

$$\beta < 1/(96p\alpha\sigma_2^2),$$

thus

$$24p\beta\sigma_2^2\kappa^2 < \kappa^2/(4\alpha) \leq 1/(16c).$$

Consequently, we have

$$(\frac{1}{4c} - 24p\beta\sigma_2^2\kappa^2 - \kappa^2/(4\alpha)) < 1/(8c).$$

By the definition of  $\sigma_1$  and the conditions  $p \geq 3L, \beta < \frac{1}{20}$ , we have

$$(\frac{p}{4\beta} - 48p\beta\sigma_1^2) \geq \frac{p}{8\beta}.$$

405 Combining the above, we have

$$\begin{aligned} & \phi^t - \phi^{t+1} \\ & \geq \frac{1}{8c} \|x^t - x^{t+1}\|^2 \\ & \quad + \frac{1}{8\alpha} \|y^t - y_+^t(z^t)\|^2 + \frac{p}{8\beta} \|z^t - z^{t+1}\|^2 \\ & \quad - 24p\beta \|x^*(z^t) - x(y_+^t(z^t), z^t)\|^2, \end{aligned}$$

406 which finishes the proof. ■

## 407 B.2 General nonconvex-concave case

408 We have the following error bound:

409 **Lemma B.10** *We have*

$$\begin{aligned} (p - L) \|x^*(z^t) - x(y_+^t(z^t), z^t)\|^2 & < (1 + \alpha L) \|y^t - y_+^t(z^t)\| \cdot \text{dist}(y_+^t(z^t), Y(z^t)). \\ & \leq (1 + \alpha L) \|y^t - y_+^t(z^t)\| \cdot DY, \end{aligned}$$

410 where  $D(Y)$  is the diameter of  $Y$ .

411 The proof will be given in the next section.

412 **Lemma B.11** *If*

$$\max\{\|x^t - x^{t+1}\|, \|y^t - y_+^t(z^t)\|, \|z^t - x^{t+1}\|\} \leq \bar{\lambda}\epsilon, \quad (\text{B.43})$$

413 then  $(x^{t+1}, y^{t+1})$  is a  $\lambda\epsilon$ -solution for some  $\lambda > 0$ .

414 **Proof**

By the update of  $x^{t+1}$ , we have

$$x^{t+1} = \arg \min_{x \in X} \{\langle \nabla_x f(x^t, y^t) + p(x^t - z^t), x - x^t \rangle + \frac{1}{c} \|x - x^t\|^2 + \iota(x)\}.$$

415 Therefore, we have

$$0 \in \nabla_x f(x^{t+1}, y^t) + p(x^{t+1} - z^t) + \frac{1}{c}(x^{t+1} - x^t) + \iota(x^{t+1}). \quad (\text{B.44})$$

416 Similarly, we have

$$0 \in \arg \min_{y \in Y} \{-\nabla_y f(x^{t+1}, y^t) + \frac{1}{\alpha}(y^{t+1} - y^t) + \iota(y^{t+1})\}. \quad (\text{B.45})$$

We let

$$u = (\nabla_x f(x^{t+1}, y^t) - \nabla_x f(x^t, y^t)) + (\nabla_x f(x^{t+1}, y^{t+1}) - \nabla_x f(x^{t+1}, y^t)) - p(x^{t+1} - z^t) - \frac{1}{c}(x^{t+1} - x^t)$$



and

$$v = \nabla_y f(x^{t+1}, y^t) - \nabla_y f(x^{t+1}, y^{t+1}) - \frac{1}{\alpha}(y^{t+1} - y^t).$$

417 By the Lipschitz-continuity of  $\nabla_x f(x, y)$ , Lemma B.9 and (B.43), we have

$$\begin{aligned} \|u\| &\leq L\|x^t - x^{t+1}\| + L\|y^t - y^{t+1}\| + p\epsilon + \frac{1}{C}\epsilon \\ &\leq (1 + p + 1/c)\epsilon + L\|y^t - y_+^t(z^t)\| + \|y_+^t(z^t) - y^{t+1}\| \\ &\leq (1 + p + 1/c)\epsilon + \epsilon + \kappa\epsilon, \end{aligned}$$

where the first and the second inequalities are both due to (B.43), the triangular inequality and the Lipschitz-continuity of  $\nabla_x f(\cdot)$  and the last inequality is because of Lemma B.9. Similarly, we can prove that

$$\|v\| \leq (L + 1 + \kappa + \frac{1}{\alpha})\epsilon.$$

418 Hence, we finish the proof with  $\eta = 2 + L + p + \kappa + \max\{1/c, 1/\alpha\}$ .

419

420 We say that  $\phi^t$  decreases sufficiently if

$$\phi^t - \phi^{t+1} \geq \frac{1}{16c}\|x^t - x^{t+1}\|^2 + \frac{1}{16\alpha}\|y^t - y_+^t(z^t)\|^2 + \frac{p\beta}{16}\|z^t - x^{t+1}\|^2. \quad (\text{B.46})$$

421 **Lemma B.12** *Let  $T > 0$ . Then if for any  $t \in \{0, 1, \dots, T-1\}$ , (B.46) holds, there must exist*  
 422 *a  $t \in \{1, 2, \dots, T\}$  such that  $(x^t, y^t)$  is an  $C/\sqrt{T\beta}$ -solution. Moreover, if for any  $t \geq 0$ , (B.46)*  
 423 *holds, Then any limit point of  $(x^t, y^t)$  is a solution of (1.2), and the iteration complexity of attaining*  
 424 *an  $\epsilon$ -solution is  $\mathcal{O}(1/\epsilon^2)$ .*

425 **Proof**

426 We have

$$\begin{aligned} \phi^0 - \underline{f} &\geq \sum_{t=0}^{T-1} (\phi^t - \phi^{t+1}) \\ &\geq (1/(16c) + 1/(16\alpha) + p/16) \sum_{t=0}^{T-1} \max\{\|x^t - x^{t+1}\|^2, \|y^t - y_+^t(z^t)\|^2, \beta\|x^{t+1} - z^t\|^2\} \end{aligned} \quad (\text{B.47})$$

where the last inequality is due to (B.46). Therefore, there exists a  $t \in \{0, 1, \dots, T-1\}$  such that  
 $(1/(16c) + 1/(16\alpha) + p/16) \max\{\|x^t - x^{t+1}\|^2, \|y^t - y_+^t(z^t)\|^2, \beta\|x^{t+1} - z^t\|^2\} \leq (\phi^0 - \underline{f})/T$ .  
 Since  $\beta < 1$ , we further get

$$(1/(16c) + 1/(16\alpha) + p/16) \max\{\|x^t - x^{t+1}\|^2, \|y^t - y_+^t(z^t)\|^2, \|x^{t+1} - z^t\|^2\} \leq (\phi^0 - \underline{f})/(T\beta).$$

427 Hence, by Lemma B.11,  $(x^{t+1}, y^{t+1})$  is a  $\sqrt{(\phi^0 - \underline{f})/((1/8c + 1/8\alpha + 16)T\beta)}$ -solution. Ac-  
 428 cording to above analysis, If (B.46) holds for any  $t$ , we can attain an  $\epsilon$ -solution within  $(\phi^0 -$   
 429  $\underline{f})/(\beta(1/(16c) + 1/(16\alpha) + p/16)\epsilon^2)$  iterations. Moreover, if (B.46) holds for any  $t$ , by (B.47), we  
 430 have

$$\max\{\|x^t - x^{t+1}\|, \|y^t - y_+^t(z^t)\|, \|z^t - x^{t+1}\|\} \rightarrow 0. \quad (\text{B.49})$$

Consequently, for any limit point  $(\bar{x}, \bar{y})$  of  $(x^t, y^t)$ , there exists a  $\bar{z}$  such that

$$\max\{\|\bar{x} - \bar{x}_+(\bar{y}, \bar{z})\|, \|\bar{y} - \bar{y}_+(\bar{z})\|, \|\bar{x}_+(\bar{y}, \bar{z}) - \bar{z}\|\} = 0,$$

which yields  $(\bar{x}, \bar{y})$  is a stationary solution. Here

$$x_+(y, z) = P_X(x - \nabla_x K(x, z; y)).$$

431

432 Now we are ready to prove Theorem 3.3.

433 **Proof** [Proof of Theorem 3.3] There are two cases (B.50) and (B.51) as discussed in the proof for  
 434 the general nonconvex-concave problems in last subsection.

435 1. For some  $t \in \{0, 1, \dots, T-1\}$ , we have

$$\frac{1}{2} \max\left\{\frac{1}{8c}\|x^t - x^{t+1}\|^2, \frac{1}{8\alpha}\|y^t - y_+^t(z^t)\|^2, \frac{p}{8\beta}\|z^t - z^{t+1}\|^2\right\} \leq 24p\beta\|x^*(z^t) - x(y_+^t(z^t), z^t)\|^2. \quad (\text{B.50})$$

436 2. For any  $t \in \{0, 1, \dots, T-1\}$ ,

$$\frac{1}{2} \max\left\{\frac{1}{8c}\|x^t - x^{t+1}\|^2, \frac{1}{8\alpha}\|y^t - y_+^t(z^t)\|^2, \frac{p}{8\beta}\|z^t - z^{t+1}\|^2\right\} \geq 24p\beta\|x^*(z^t) - x(y_+^t(z^t), z^t)\|^2 \quad (\text{B.51})$$

437 In the first case (B.50), we have

$$\begin{aligned} \|y^t - y_+^t(z^t)\|^2 &\leq 384p\beta\alpha\|x(y_+^t(z^t), z^t) - x^*(z^t)\|^2 \\ &\leq 384p\beta\alpha\frac{(1+\alpha L)}{p-L}\|y^t - y_+^t(z^t)\|D(Y). \end{aligned}$$

438 Hence, letting  $\lambda_1 = 384p\alpha\frac{(1+\alpha L)}{p-L} \cdot D(Y)$ , we have

$$\|y^t - y_+^t(z^t)\| \leq \lambda_1\beta. \quad (\text{B.52})$$

439 Moreover,

$$\|x^{t+1} - z^t\|^2 = \|(z^{t+1} - z^t)/\beta\|^2 \quad (\text{B.53})$$

$$\stackrel{(i)}{\leq} 384p\|x(y_+^t(z^t), z^t) - x^*(z^t)\|^2 \quad (\text{B.54})$$

$$\stackrel{(ii)}{\leq} 384p\frac{1+\alpha L}{p-L}D(Y)\|y^t - y_+^t(z^t)\| \quad (\text{B.55})$$

$$\stackrel{(iii)}{\leq} 384p\frac{1+\alpha L}{p-L}D(Y)\lambda_1\beta, \quad (\text{B.56})$$

440 where Inequality (i) is due to Inequality (B.50) and (ii) is because of Lemma B.10 and (iii) is due to  
441 (B.52). We also have

$$\|x^t - x^{t+1}\|^2 \stackrel{(i)}{\leq} 384cp\beta\|x^*(z^t) - x(y_+^t(z^t), z^t)\|^2 \quad (\text{B.57})$$

$$\stackrel{(ii)}{\leq} 384pc\beta\frac{1+\alpha L}{p-L}D(Y)\|y^t - y_+^t(z^t)\| \quad (\text{B.58})$$

$$\stackrel{(iii)}{\leq} 384pc\frac{1+\alpha L}{p-L}\lambda_1D(Y)\beta^2, \quad (\text{B.59})$$

442 where (i) is due to (B.50), (ii) is due to Lemma B.10 and (iii) is because of (B.52). Combining the  
443 above, in the first case, we have

$$\max\{\|x^t - x^{t+1}\|^2, \|y^t - y_+^t(z^t)\|^2, \|z^t - x^{t+1}\|^2\} \quad (\text{B.60})$$

$$\leq \max\{\lambda_2\beta^2, \lambda_1^2\beta^2, \lambda_3\beta\}, \quad (\text{B.61})$$

444 where  $\lambda_2 = 384p\frac{1+\alpha L}{p-L}D(Y)\lambda_1$  and  $\lambda_3 = 192pc\frac{1+\alpha L}{p-L}\lambda_1D(Y)$  According to Lemma B.11, there  
445 exists a  $\lambda > 0$  such that  $(x^{t+1}, y^{t+1})$  is a  $\lambda$   
446  $\max\{\beta, \sqrt{\beta}\}$ -solution.

In the second case, we have

$$\phi^t - \phi^{t+1} \geq \frac{1}{16c}\|x^t - x^{t+1}\|^2 + \frac{1}{16\alpha}\|y^t - y_+^t(z^t)\|^2 + \frac{1}{16\beta}\|z^t - z^{t+1}\|^2$$

447 for any  $t \in \{0, 1, \dots, T-1\}$ . By Lemma B.12, there exists a  $t \in \{0, 1, \dots, T-1\}$ , such that  
448  $(x^{t+1}, y^{t+1})$  is a  $\sqrt{(\phi^0 - f)/((1/8c + 1/8\alpha + 16)T\beta)}$ -solution Finally taking  $\beta = 1/\sqrt{T}$  and  
449 combining the two cases with Lemma B.12 yield the desired results.

450 ■

### 451 B.3 The max problem is over a discrete set

452 In this subsection, we prove Theorem 3.6. We will prove that under the strict complementarity  
453 assumption, the potential function  $\phi^t$  decreases sufficiently after any iteration. Then by the following  
454 simple lemma, we can prove Theorem 3.6.

By the bounded level set assumption (Assumption 3.5) and the fact that  $\psi(z) \leq P(z)$ , for any  
( $x^0, y^0, z^0$ )  $\in \mathbb{R}^{n+m+n}$ , there exists a constant  $R(x^0, y^0, z^0) > 0$  such that

$$\{z \mid P(z) \leq \phi(x^0, y^0, z^0)\} \subseteq \mathcal{B}(R(x^0, y^0, z^0)).$$

455 Then we have the following “dual error bound”. Note that this error bound is homogeneous com-  
456 pared to Lemma B.10.

**Lemma B.13** *Let*

$$x_+(y, z) = P_X(x - \nabla_x K(x, z; y)).$$

*If the strict complementarity assumption and the bounded level set assumption hold for (1.2), there  
exists  $\delta > 0$ , such that if*

$$\|z\| \leq R(x^0, y^0, z^0),$$

*and*

$$\max\{\|x - x_+(y, z)\|, \|y - y_+(z)\|, \|x_+(y, z) - z\|\} < \delta$$

*we have*

$$\|x(y_+(z), z) - x^*(z)\| < \sigma_5 \|y - y_+(z)\|$$

457 *for some constant  $\sigma_5 > 0$ .*

458 Equipped with the dual error bound, we can prove the that the potential function decreases after any  
459 iteration in the following proposition:

460 **Proposition B.14** *Suppose the conditions in Theorem 3.6 holds, we have*

$$\phi^t - \phi^{t+1} \geq \frac{1}{16c} \|x^t - x^{t+1}\|^2 + \frac{1}{16\alpha} \|y^t - y_+^t(z^t)\|^2 + \frac{p}{16\beta} \|z^t - z^{t+1}\|^2. \quad (\text{B.62})$$

461 **Proof** We set  $\beta < \min\{\delta/\sqrt{\lambda_2}, \delta/\lambda_1, \delta^2/\lambda_3, 1/(384p\alpha\sigma_5^2)\}$ . First, we prove that

$$\phi^t - \phi^{t+1} \geq \frac{1}{16c} \|x^t - x^{t+1}\|^2 + \frac{1}{16\alpha} \|y^t - y_+^t(z^t)\|^2 + \frac{p}{16\beta} \|z^t - z^{t+1}\|^2. \quad (\text{B.63})$$

and

$$\|z^t\| < R(x^0, y^0, z^0)$$

462 for any  $t \geq 0$ . We prove it by induction. We will prove that

463 1. If  $\|z^t\| \leq R(x^0, y^0, z^0)$ , then

$$\phi^t - \phi^{t+1} \geq \frac{1}{16c} \|x^t - x^{t+1}\|^2 + \frac{1}{16\alpha} \|y^t - y_+^t(z^t)\|^2 + \frac{p}{16\beta} \|z^t - z^{t+1}\|^2. \quad (\text{B.64})$$

464 2. If  $\phi^{t+1} \leq \phi^t$ , we have  $\|z^{t+1}\| \leq R(x^0, y^0, z^0)$ .

465 For  $t = 0$ , it is trivial that  $\|z^t\| \leq R(x^0, y^0, z^0)$ . For the first step, assume that we have  $\|z^t\| \leq$   
466  $R(x^0, y^0, z^0)$ . There are two cases:

467 1. For some  $t$ , we have

$$\frac{1}{2} \max\left\{\frac{1}{8c} \|x^t - x^{t+1}\|^2, \frac{1}{8\alpha} \|y - y_+^t(z^t)\|^2, \frac{p}{8\beta} \|z^t - z^{t+1}\|^2\right\} \leq 24p\beta \|x^*(z^t) - x(y_+^t(z^t), z^t)\|^2. \quad (\text{B.65})$$

468 2. For any  $t$ ,

$$\frac{1}{2} \max\left\{\frac{1}{8c} \|x^t - x^{t+1}\|^2, \frac{1}{8\alpha} \|y - y_+^t(z^t)\|^2, \frac{p}{8\beta} \|z^t - z^{t+1}\|^2\right\} \geq 24p\beta \|x^*(z^t) - x(y_+^t(z^t), z^t)\|^2 \quad (\text{B.66})$$

469 For the first case, as in the last subsection, we have

$$\begin{aligned} & \max\{\|x^t - x^{t+1}\|^2, \|y^t - y_+^t(z^t)\|^2, \|x^{t+1} - z^t\|^2\} \\ & \leq \max\{\lambda_2\beta^2, \lambda_1^2\beta^2, \lambda_3\beta\} \\ & \leq \delta^2. \end{aligned}$$

470 Hence, we can make use of Lemma B.13. In fact, we have

$$\begin{aligned} 24p\beta\|x(y_+^t(z^t), z^t) - x^*(z^t)\|^2 & \leq 24p\beta\sigma_5^2\|y^t - y_+^t(z^t)\| \\ & \leq \frac{1}{16\alpha}\|y^t - y_+^t(z^t)\|^2, \end{aligned}$$

471 which yields (B.46) together with (B.15). For the second case, (B.46) holds as in the last subsection. Hence, if  $\|z^t\| \leq R(x^0, y^0, z^0)$ , we have (B.46). For the second step, if (B.46) holds for  
472  $0, 1, \dots, (t-1)$ , we have  
473

$$\begin{aligned} P(z^{t+1}) & \leq \phi^{t+1} \\ & \leq \phi^0. \end{aligned}$$

474 Hence,  $z^{t+1} \in \mathcal{B}(R(x^0, y^0, z^0))$ . Combining these, for any  $t \geq 0$ ,  $\|z^t\| \leq R(x^0, y^0, z^0)$  and (B.46)  
475 holds. Then the theorem comes from Lemma B.12. ■

## 476 C The multi-block cases

477 The proofs for the multi-block case is similar to the one-block case. In this section, we briefly  
478 introduce the proof of them. Note that the only differences for proving the theorem s are Lemma  
479 B.5, (B.5) and Proposition 4.1. Instead, we have the following:

480 **Lemma C.1 (Primal Descent)** *For any  $t$ , we have*

$$\begin{aligned} K(x^t, z^t; y^t) - K(x^{t+1}, z^{t+1}; y^{t+1}) & \geq \frac{1}{2c}\|x^t - x^{t+1}\|^2 + \langle \nabla_y K(x^{t+1}, z^t; y^t), y^t - y^{t+1} \rangle \\ & \quad - \frac{L}{2}\|y^t - y^{t+1}\|^2 + \frac{p}{2\beta}\|z^t - z^{t+1}\|^2. \end{aligned} \quad (\text{C.1})$$

481 The proof of it is the same as Lemma 5.3 in [29]. The error bound (B.5) becomes:

**Lemma C.2** *We have*

$$\|x^{t+1} - x(y^t, z^t)\| \leq \sigma'_3\|x^t - x^{t+1}\|,$$

482 where  $\sigma'_3 = (c(p-L) + 1 + c(L+p)N^{3/2})/c(p-L)$ .

483 The proof of Lemma C.2 is similar to Lemma 5.2 in [29] hence omitted here. Because of the above  
484 two differences, we have a replacement of Proposition B.4:

485 **Proposition C.3** *We let*

$$p > 3L, c < \frac{1}{p+L}, \alpha < \min\left\{\frac{1}{11L}, \frac{c^2(p-L)^2}{4L(1+c(p+L)N^{3/2}+c(p-L))^2}\right\}, \min\left\{\frac{1}{20}, \beta < \frac{(p-L)^2}{384p(p+L)^2}\right\}. \quad (\text{C.2})$$

486 *Then we have*

$$\begin{aligned} & \phi^t - \phi^{t+1} \\ & \geq \frac{1}{4c}\|x^t - x^{t+1}\|^2 \end{aligned} \quad (\text{C.3})$$

$$+ \frac{1}{4\alpha}\|y^t - y_+^t(z^t)\|^2 + \frac{p}{8\beta}\|z^t - z^{t+1}\|^2 \quad (\text{C.4})$$

$$- 24p\beta\|x^*(z^t) - x(y_+^t(z^t), z^t)\|^2 \quad (\text{C.5})$$

487 The proof of Proposition C.3 is similar to Proposition B.4 hence omitted.

## 488 D Proof of the error bound lemmas

### 489 D.1 Proof of lemma B.10

Let

$$x_+(y, z) = P_X(x - c\nabla_x K(x, z; y))$$

and

$$y_+(z) = P_Y(y + \alpha\nabla_y K(x(y, z), z; y)).$$

490 Then Lemma B.10 can be written as

491 **Lemma D.1** *We have*

$$\begin{aligned} (p - L)\|x^*(z) - x(y_+(z), z)\|^2 &< (1 + \alpha L)\|y - y_+(z)\| \cdot \text{dist}(y_+(z), Y(z)). \\ &\leq (1 + \alpha L)\|y - y_+(z)\| \cdot D(Y), \end{aligned}$$

492 where  $D(Y)$  is the diameter of  $Y$ .

493 **Proof** By the strong convexity of  $K(\cdot, z; y)$ , we have

$$K(x^*(z), z, ; y_+(z)) - K(x(y_+(z), z), z; y_+(z)) \geq \frac{p - L}{2}\|x(y_+(z), z) - x^*(z)\|^2 \quad (\text{D.1})$$

$$K(x(y_+(z), z), z; y(z)) - K(x^*(z), z; y(z)) \geq \frac{p - L}{2}\|x(y_+(z), z) - x^*(z)\|^2, \quad (\text{D.2})$$

where  $y(z)$  is an arbitrary vector in  $Y(z)$ . Notice that  $y_+(z)$  is the maximizer of the following problem:

$$\max_{\bar{y} \in Y} \{K(x(y_+(z), z), z; \bar{y}) - \delta^T(y, y_+(z); z)\bar{y}\},$$

where

$$\delta(y, y_+(z); z) = (y_+(z) + \alpha\nabla_{\bar{y}} K(x(y_+(z), z), z; y_+(z))) - (y + \alpha\nabla_{\bar{y}} K(x(y_+(z), z), z; y))$$

satisfies

$$\|\delta(y, y_+(z); z)\| < (1 + \alpha L)\|y - y_+(z)\|,$$

494 by the Lipschitz-continuity of  $\nabla_y K = \nabla_y f$ . Hence, we have

$$\begin{aligned} &K(x(y_+(z), z), z; y(z)) - \delta^T(y, y_+(z); z)y(z) \\ &\leq K(x(y_+(z), z), z; y_+(z)) - \delta^T(y, y_+(z); z)y_+(z). \end{aligned}$$

495 Then, we have the following estimates:

$$K(x(y_+(z), z), z; y(z)) - K(x(y_+(z), z), z; y_+(z)) \quad (\text{D.3})$$

$$\leq (y(z) - y_+(z))^T \delta(y, y_+(z); z) \quad (\text{D.4})$$

$$\leq \|y_+(z) - y(z)\| \cdot (1 + \alpha L)\|y - y_+(z)\|. \quad (\text{D.5})$$

Also because  $y(z)$  maximizes

$$\max_{\bar{y} \in Y} K(x^*(z), \bar{y}; z),$$

496 we have

$$K(x^*(z), z; y(z)) \geq K(x^*(z), z; y_+(z)). \quad (\text{D.6})$$

Since  $y(z)$  is an arbitrary vector in  $Y(z)$ , combining (D.1), (D.3), (D.6), we have

$$(p - L)\|x^*(z) - x(y_+(z), z)\|^2 < (1 + \alpha L)\|y - y_+(z)\| \cdot \text{dist}(y_+(z), Y(z)),$$

497 which is the desired result. ■

498 **D.2 Proof of Lemma B.13**

499 For a pair of min-max solution of (1.2), the KKT conditions in the following hold:

$$J^T F(x^*)y = 0, \quad (\text{D.7})$$

$$\sum_{i=1}^m y_i = 1, \quad (\text{D.8})$$

$$y_i \geq 0, \forall i \in [m] \quad (\text{D.9})$$

$$\mu - \nu_i = f_i(x), \forall i \in [m], \quad (\text{D.10})$$

$$\nu_i \geq 0, \nu_i y_i = 0, \forall i \in [m], \quad (\text{D.11})$$

500 where  $\mu$  is the multiplier of the equality constraint  $\sum_{i=1}^m y_i = 1$  and  $\nu_i$  is the multiplier for the  
501 inequality constraint  $y_i \geq 0$ .

**Definition D.2** For  $y \in Y$ , we define the active set

$$\mathcal{A}[y] = \{i \in [m] \mid y_i = 0\}.$$

We also define the inactive set of  $y$  as follows:

$$\mathcal{I}[y] = \{i \in [m] \mid y_i > 0\}.$$

502 **Definition D.3** For an  $x \in \mathbb{R}^n$ , we define the top coordinate set  $\mathcal{T}(x)$  as the collection of all indexes  
503 of the top coordinates of  $F(x)$ , i.e.,  $f_i(x) > f_j(x)$  if  $i \in \mathcal{T}(x), j \notin \mathcal{T}(x)$  and  $f_i(x) = f_j(x)$  if  
504  $i, j \in \mathcal{T}(x)$ .

According to the KKT conditions, it is easy to see that for  $(x, y) \in W^*$ ,

$$\mathcal{I}[y] \subseteq \mathcal{T}(x).$$

505 Recall that we have the following strict complementarity condition:

**Assumption D.4** For any  $(x, y)$  satisfying (D.7), we have

$$\nu_i > 0, \forall i \in \mathcal{A}[y].$$

It is easy to see that if the strict complementarity assumption holds,

$$\mathcal{I}[y] = \mathcal{T}(x)$$

506 for  $(x, y) \in W^*$ . Then we can prove the following “dual error bound”.

**Lemma D.5** If the strict complementarity assumption holds for (1.2), there exists  $\delta > 0$ , such that  
if

$$\|z\| \leq R(x^0, y^0, z^0),$$

and

$$\max\{\|x - x_+(y, z)\|, \|y - y_+(z)\|, \|x_+(y, z) - z\|\} < \delta$$

we have

$$\|x(y_+(z), z) - x^*(z)\| < \sigma_5 \|y - y_+(z)\|$$

507 for some constant  $\sigma_5 > 0$ .

508 To prove this, we need the following lemmas. First, we prove that if the residuals go to zero, the  
509 iteration points converge to a solution.

**Lemma D.6** If  $\{z^k\}$  is a sequence with  $\|z^k\| \leq R(x^0, y^0, z^0)$  and

$$\max\{\|x^k - x_+(y^k, z^k)\|, \|y^k - y_+(z^k)\|, \|x_+(y^k, z^k) - z^k\|\} \rightarrow 0,$$

510 there exists a sub-sequence of  $\{z^k\}$  converging to some  $\bar{z} \in X^*$ .

511 **Proof** It is just a direct corollary of Lemma B.11. ■

**Lemma D.7** *Let*

$$M(x) = \{J_{\mathcal{T}(x)}F(x) \quad \mathbf{1}\}.$$

512 *Then if  $(x, y) \in W^*$ , the matrix  $M(x)(x)$  is of full row rank.*

**Proof** We prove it by contradiction. If for some  $(x^*, y^*, \mu^*, \nu^*)$  satisfying (D.7),  $M(x^*)$  is not of full row rank. Without loss of generality, we assume that  $\mathcal{T}(x^*) = \{1, 2, \dots, |\mathcal{T}(x^*)|\}$ . Then there exists a nonzero vector  $v \in \mathbb{R}^{|\mathcal{T}(x^*)|}$  such that

$$M^T(x^*)v = 0.$$

513 Let  $d = \min_{i \in \mathcal{I}[y^*]} \{y_i / |v_i|\}$ . Then we define a vector  $y' \in \mathbb{R}^m$  as:

$$\begin{aligned} y'_i &= y^* - dv_i, \quad \text{when } i \in \mathcal{I}; \\ y'_i &= 0, \quad \text{when } i \notin \mathcal{I}. \end{aligned}$$

514 Notice that  $y'_i = 0$  for any  $i \notin \mathcal{T}(x^*)$ . Then  $y'$  satisfies

$$\begin{aligned} J^T F(x^*)y' &= 0, \\ \sum_{i=1}^m y'_i &= 1, \\ y'_i &\geq 0, i \in \mathcal{T}(x^*), \\ y'_i &= 0, i \notin \mathcal{T}(x^*). \end{aligned}$$

515 Therefore,  $(x^*, y', \mu, \nu)$  still satisfies (D.7). Moreover, let  $i_0 \in \mathcal{I}$  satisfying  $d = y_{i_0}^* / v_{i_0}$ . Then  
516  $y'_{i_0} = \nu_{i_0} = 0$ . This is a contradiction to the strict complementarity assumption. ■

517 We then have the following corollary from the above lemma and (D.7):

518 **Corollary D.8** *For any  $x^* \in X^*$ , there exists only one  $y \in Y$  such that  $(x^*, y) \in W^*$  and there*  
519 *exists only one  $(\mu, \nu)$  such that  $(x^*, y, \mu, \nu)$  satisfies (D.7).*

**Proof** First, this  $(y, \mu, \nu)$  must exist due to the existence of a solution. Next, the solution  $y$  must satisfy

$$M^T(x^*)y = (0, 0, \dots, 0, 1)^T.$$

520 By Lemma D.7,  $M^T(x^*)$  is of full column rank hence the solution of  $y$  is unique. Furthermore, since  
521  $\sum_{i=1}^m y_i = 1$ , there is at least one  $i$  such that  $y_i > 0, \nu_i = 0$ . Without loss of generality, we assume  
522 that  $y_1 > 0, \nu_1 = 0$ . Then  $\mu = f_1(x^*)$  by (3.5). Further by (3.5),  $\nu_i = f_i(x^*) - \mu, i = 2, 3, \dots, m$ .  
523 Hence,  $\mu, \nu_i$  are uniquely defined. ■

**Lemma D.9** *If the strict complementarity assumption holds for (1.2), there exists  $\delta > 0, \gamma > 0$ , such that if*

$$\|z\| \leq R(x^0, y^0, z^0),$$

*and*

$$\max\{\|x - x_+(y, z)\|, \|y - y_+(z)\|, \|x_+(y, z) - z\|\} < \delta$$

524  $\gamma(M(x^*(z))) \geq \gamma$  and  $\gamma(M(x(y, z))) \geq \gamma$ .

**Proof** We prove it by contradiction. Suppose it is not true, there exists  $\{z^k\} \subseteq \mathcal{B}(R(x^0, y^0, z^0))$  such that  $\gamma(M(x^*(z^k))) \rightarrow 0$  and

$$\max\{\|x^k - x_+^k(y^k, z^k)\|, \|y^k - y_+^k(z^k)\|, \|x_+^k(y^k, z^k) - z^k\|\} \rightarrow 0.$$

Since  $\mathcal{T}(x)$  has only finite choice, without loss of generality, we assume that  $\mathcal{T}(x^*(z^k)) = \mathcal{T}$  for any  $k$  (passing to a sub-sequence if necessary). By Lemma D.6, there exists a  $\bar{z} \in X^*$  such that  $z^k \rightarrow \bar{z}$ . We let

$$\tilde{M}(\bar{z}) = \lim_{k \rightarrow \infty} M(x^*(z^k)) = \{J_{\mathcal{T}}(x^*(\bar{z})) \quad \mathbf{1}\}.$$

By the continuity of  $x^*(\cdot)$  ((B.3) of Lemma B.2) and the continuity of the function of taking the least singular value, we know that

$$\gamma(\tilde{M}(\bar{z})) = 0,$$

where we also use the fact that  $x^*(\bar{z}) = \bar{z}$  by Lemma B.8. Moreover, according to the definition of  $\mathcal{T}[\bar{z}]$ , we have  $f_i(x^*(z^k)) > f_j(x^*(z^k))$  for any  $k$  with  $i \in \mathcal{T}, j \notin \mathcal{T}$ . Therefore, we have  $f_i(\bar{z}) \geq f_j(\bar{z})$  for  $i \in \mathcal{T}, j \notin \mathcal{T}$ . Consequently, we have

$$\mathcal{T} \subseteq \mathcal{T}[\bar{z}].$$

525 Therefore  $\tilde{M}(x^*(\bar{z}))$  is a row sub-matrix of  $M(\bar{z})$ . Consequently,  $M(\bar{z})$  is not of full row rank. This  
 526 is a contradiction! For  $x(y, z)$ , it is similar to prove the desired result. Hence the details are omitted.  
 527 ■

528 The following lemma shows that if the residuals are small, the active set of  $y_+(z)$  and  $y(z) \in Y(z)$   
 529 are the same.

**Lemma D.10** *If the strict complementarity assumption holds for (1.2), there exists  $\delta > 0$ , such that if*

$$\|z\| \leq R(x^0, y^0, z^0),$$

and

$$\max\{\|x - x_+(y, z)\|, \|y - y_+(z)\|, \|x_+(y, z) - z\|\} < \delta,$$

we have

$$\mathcal{A}[y_+(z)] = \mathcal{A}[y(z)], \text{ for some } y(z) \in Y(z).$$

**Proof** We prove it by contradiction. Suppose that there exists a sequence  $\{(x^k, y^k, z^k)\}$  such that

$$\max\{\|x^k - x_+(y^k, z^k)\|, \|y^k - y_+(z^k)\|, \|x_+(y^k, z^k) - z^k\|\} \rightarrow 0$$

and

$$\mathcal{A}[y_+(z^k)] \neq \mathcal{A}[y(z^k)].$$

530 Since  $\{y_+(z^k)\}, \{z^k\}$  are bounded, we assume that  $y_+(z^k) \rightarrow \bar{y}, z^k \rightarrow \bar{z}$ . We write down the KKT  
 531 condition for  $(x(y_+(z^k), z^k), y_+(z^k))$  as follows:

$$J^T F(x(y_+(z^k), z^k)) y_+(z^k) + p(x(y_+(z^k), z^k) - z^k) = 0, \quad (\text{D.12})$$

$$\sum_{i=1}^m (y_i^k)_+(z^k) = 1, \quad (\text{D.13})$$

$$(y_i^k)_+(z^k) \geq 0, \forall i \in [m] \quad (\text{D.14})$$

$$\frac{1}{\alpha} (y_i^k)_+(z^k) - \frac{1}{\alpha} y_i^k + f_i(x(y_+(z^k), z^k)) + \mu^k - \nu_i^k = f_i(x(y_+(z^k), z^k)), \forall i \in [m], \quad (\text{D.15})$$

$$\nu_i^k \geq 0, \nu_i^k (y_i^k)_+(z^k) = 0, \forall i \in [m], \quad (\text{D.16})$$

It is not hard to check that  $\mu, \nu$  are bounded. Hence, we assume that  $\mu^k \rightarrow \bar{\mu}$  and  $\nu^k \rightarrow \bar{\nu}$ . We take limit to (D.12) and make use of the fact that

$$\|y^k - y_+(z^k)\| \rightarrow 0$$

together with Lemma B.2. We then attain that  $(x(\bar{y}, \bar{z}), \bar{y})$  is a min-max solution of (1.2), i.e.,  $(x(\bar{y}, \bar{z}), \bar{y}, \bar{\mu}, \bar{\nu})$  satisfies (D.7). By the strict complementarity assumption,  $\bar{\nu}_i > 0$  for  $i \in \mathcal{A}[\bar{y}]$  and  $\bar{y}_i > 0$  for  $i \notin \mathcal{A}[\bar{y}]$ . Hence, for  $k$  sufficiently large, we have  $\mathcal{A}[y_+(z^k)] = \mathcal{A}[\bar{y}]$ . Similarly, when  $k$  is sufficiently large, we have

$$\mathcal{A}[y(z^k)] = \mathcal{A}[\bar{y}].$$

532 ■



533 We also write down the KKT conditions for  $x^*(z)$  for some  $z$ .

$$J^T F(x^*(z))y + p(x^*(z) - z) = 0, \quad (\text{D.17})$$

$$\sum_{i=1}^m y_i = 1, \quad (\text{D.18})$$

$$y_i \geq 0, \forall i \in [m] \quad (\text{D.19})$$

$$\mu - \nu_i = f_i(x), \forall i \in [m], \quad (\text{D.20})$$

$$\nu_i \geq 0, \nu_i y_i = 0, \forall i \in [m], \quad (\text{D.21})$$

**Lemma D.11** *If the strict complementarity assumption holds for (1.2), there exists  $\delta > 0$ , such that if*

$$\|z\| \leq R(x^0, y^0, z^0),$$

and

$$\max\{\|x - x_+(y, z)\|, \|y - y_+(z)\|, \|x_+(y, z) - z\|\} < \delta$$

we have

$$\text{dist}(y_+(z), y(z)) < \lambda \|x^*(z) - x(y_+(z), z)\|$$

534 for some constant  $\lambda > 0$ .

**Proof** By Lemma D.10, if the strict complementarity assumption holds for (1.2), there exists  $\delta > 0$ , such that if

$$\|z\| \leq R(x^0, y^0, z^0),$$

and

$$\max\{\|x - x_+(y, z)\|, \|y - y_+(z)\|, \|x_+(y, z) - z\|\} < \delta,$$

we have

$$\mathcal{A}[y_+(z)] = \mathcal{A}[y(z)],$$

for some  $y(z) \in Y(z)$ . Hence, we have

$$\mathcal{T}(x^*(z)) = \mathcal{T}(x(y_+(z), z)).$$

535 Let  $\mathcal{T} = \mathcal{T}(x^*(z))$ . Then for  $i \notin \mathcal{T}$ ,  $y_i(z) = (y_+(z))_i = 0$  and  $\|y(z) - y_+(z)\| = \|(y(z))_{\mathcal{T}} -$   
536  $(y_+(z))_{\mathcal{T}}\|$ . Using the optimality conditions for  $x(y_+(z), z)$  (D.12) and  $x^*(z)$  (D.17), we have

$$M^T(x(y_+(z), z))(y_+(z))_{\mathcal{T}} + \begin{Bmatrix} p(x(y_+(z), z) - z) \\ 0 \end{Bmatrix} = (0, 0, \dots, 0, 1), \quad (\text{D.22})$$

537 and

$$M^T(x^*(z))(y(z))_{\mathcal{T}} + \begin{Bmatrix} p(x^*(z) - z) \\ 0 \end{Bmatrix} = (0, 0, \dots, 0, 1). \quad (\text{D.23})$$

538 Note that (D.22) can be written as

$$M^T(x^*(z))(y_+(z))_{\mathcal{T}} = M^T(x^*(z))(y_+(z))_{\mathcal{T}} - M^T(x(y_+(z), z))(y_+(z))_{\mathcal{T}} - \begin{Bmatrix} p(x(y_+(z), z) - z) \\ 0 \end{Bmatrix}. \quad (\text{D.24})$$

By (D.23) and (D.24), we have

$$M^T(x^*(z))((y(z))_{\mathcal{T}} - (y_+(z))_{\mathcal{T}}) = (M^T(x(y_+(z), z)) - M^T(x^*(z)))(y_+(z))_{\mathcal{T}} - \begin{Bmatrix} p(x(y_+(z), z) - x^*(z)) \\ 0 \end{Bmatrix}.$$

539 Therefore, taking norms to the above and the Lemma D.9, we have

$$\begin{aligned} \gamma \|(y_+(z))_{\mathcal{T}} - (y(z))_{\mathcal{T}}\| &\leq \sqrt{m}L \|x(y_+(z), z) - x^*(z)\| \|(y_+(z))_{\mathcal{T}}\| + p \|x(y_+(z), z) - x^*(z)\| \\ &\leq (\sqrt{m}L + p) \|x^*(z) - x(y_+(z), z)\|, \end{aligned}$$

540 where the first inequality uses the Lipschitz-continuity of  $\nabla_x f_i$  and the second is because  $\|y_+(z)\| \leq$   
541 1. Hence, we finish the proof with  $\lambda = (p + \sqrt{m}L)/\gamma$ . ■

**Proof** [Proof of Lemma B.13] By Lemma B.10 and Lemma D.11, we have

$$\|x(y_+(z), z) - x^*(z)\| \leq \frac{1 + \alpha L}{\lambda(p - L)} \|y - y_+(z)\|,$$

542 which finishes the proof with  $\sigma_5 = \frac{1 + \alpha L}{\lambda(p - L)}$ . ■

## E Discussion of the strict complementarity condition

In this section, we discuss some issues about the strict complementarity assumption. First, notice that the min-max problem (1.1) and (1.2) are both variational inequalities. As mentioned in the main text of the paper, the strict complementarity assumption is common in the field of variation inequality [36, 37]. While this assumption is popular, it is still interesting to weaken the assumption. Inspired by Lemma D.7, we prove Theorem 3.6 and Lemma 4.2 using a weaker regularity assumption rather than the strict complementarity assumption:

**Assumption E.1** For any  $(x^*, y^*) \in W^*$ , the matrix  $M(x^*)$  is of full column rank.

Here recall that

$$M(x^*) = \begin{bmatrix} J_{\mathcal{T}(x^*)} & \mathbf{1} \end{bmatrix}.$$

We say that Assumption E.1 is weaker since the strict complementarity assumption (Assumption D.4) can imply Assumption E.1 according to Lemma D.7. For this assumption, we have the following two claims:

1. If we replace Assumption D.4 by Assumption E.1 in Theorem 3.6, we can attain a same result;
2. In a robust regression problem (will define in E.2), if the data is joint from a continuous distribution, this regularity assumption holds with probability 1.

### E.1 Replacing Assumption D.4 by Assumption E.1 in Theorem 3.6

In this section, we will see that we can prove the dual error bound (Lemma 4.2) using Assumption E.1 instead of Assumption D.4.

**Lemma E.2** Let

$$x_+(y, z) = P_X(x - \nabla_x K(x, z; y)).$$

If Assumption E.1 and the bounded level set assumption hold for (1.2), there exists  $\delta > 0$ , such that if

$$\|z\| \leq R(x^0, y^0, z^0),$$

and

$$\max\{\|x - x_+(y, z)\|, \|y - y_+(z)\|, \|x_+(y, z) - z\|\} < \delta$$

we have

$$\|x(y_+(z), z) - x^*(z)\| < \sigma_5 \|y - y_+(z)\|$$

for some constant  $\sigma_5 > 0$ .

Using this Lemma, we can prove Theorem 3.6 using Assumption E.1:

**Theorem E.3** Consider solving Problem 1.2 by Algorithm 2 or Algorithm 3. Suppose that Assumption E.1 holds and either Assumption 3.5 holds or assume  $\{z^t\}$  is bounded. Then there exist constants<sup>1</sup>  $\beta'$  and  $\beta''$  depending on the problem such that the following holds.

1. (One-block case) If we choose the parameters in Algorithm 2 as in (C.2) and further let  $\beta < \beta'$ , then we have:
  - (a) Every limit point of  $(x^t, y^t)$  is a solution of (1.2).
  - (b) The iteration complexity of Algorithm 2 to attain an  $\epsilon$ -solution is  $\mathcal{O}(1/\epsilon^2)$ .
2. (Multi-block case) Consider using Algorithm 3 to solve Problem 1.2. If we replace the condition for  $\alpha$  in (C.2) by  $\alpha < \min\{\frac{1}{11L}, \frac{c^2(p-L)^2}{4L(1+c(p+L)N^{3/2}+c^2(p-L)^2)}\}$  and further require  $\beta < 1/\sqrt{T}$ ,  $\beta < 1/\sqrt{T}$  and  $\beta < \beta''$ , then we have the same results as in the one-block case.

<sup>1</sup>These two constants,  $\beta'$  and  $\beta''$ , are independent of  $\epsilon$  and  $T$  and will be discussed in the appendix.

## 574 E.2 The rationality of Assumption E.1

575 Intuitively, the assumption E.1 holds for “generic problem”. We rigorously justify this intuition  
 576 for a simple problem. More specifically, we prove that this regularity assumption is generic for a  
 577 robust regression problem using square loss, i.e., the regularity condition holds with probability 1 if  
 578 the outputs of the data points are joint from some continuous distribution. Consider the following  
 579 problem:

$$\min_{x \in \mathbb{R}^n} \max_{y \in Y} \frac{1}{2} y_i (\ell_i - \Psi(x, \xi_i))^2, \quad (\text{E.1})$$

580 where  $Y$  is the probability simplex,  $\Psi(\cdot)$  is a smooth function used to fit the data (for example the  
 581 neural network) and  $\xi_i, \ell_i$  are the input and the output of the  $i$ -th data point. We define  $\Psi_i(x) =$   
 582  $\Psi(x, \xi_i)$  for convenience. We further make the following mild assumptions:

583 **Assumption E.4**  $\ell_i$  is joint independently from a continuous distribution over a positive measure  
 584 set  $\mathcal{L}_i \subseteq \mathbb{R}$ .

585 Here a continuous distribution over  $\mathcal{L}_i$  means that for any zero measure set  $\mathcal{S} \subseteq \mathcal{R}$ ,  $\Pr(x \in \mathcal{S} \cap$   
 586  $\mathcal{L}_i) = 0$ . With assumption, for any zero measure set  $\mathcal{S} \subseteq \mathbb{R}^m$ ,  $\Pr((\ell_1, \dots, \ell_m)^T \in \mathcal{S} \cap \prod_{i=1}^m \mathcal{L}_i) =$   
 587  $0$ .

588 **Assumption E.5** Let  $\Psi(x) = (\Psi_1(x), \dots, \Psi_m(x))^T$ . Then  $\Psi(\mathbb{R}^n) \cap \prod_{i=1}^m \mathcal{L}_i = \Omega$ , where  $\Omega$  is a  
 589 zero measure set in  $\prod_{i=1}^m \mathcal{L}_i$ .

590 This assumption means that  $\min_x \max_{y \in Y} f_i(x) > 0$  with probability 1. This assumption is reason-  
 591 able. If there exists an  $x^*$  such that  $\max_i f_i(x^*) = 0$ , then because  $f_i(x) \geq 0$ , we have  $f_i(x^*) = 0$   
 592 for all  $i$ . In this case, we do not need the min-max fomulation! We just need to solve the finite sum  
 593 problem  $\min_x \sum_{i=1}^m f_i(x)$ . However, in many cases, the uncertainty is large, we do need the robust  
 594 optimization formulation. So in these cases, Assumption E.5 is reasonable.

595 Moreover, we have the following lemma:

596 **Lemma E.6** Suppose that Assumption E.4 holds. If  $m > n$ , Assumption E.5 holds with probability  
 597 1.

598 **Proof** It is direct from the claim that a smooth map  $\Psi$  maps a zero measure set into a zero measure  
 599 set. Specializing to this lemma, the map  $\Psi$  maps  $\mathbb{R}^n$  into  $\mathbb{R}^m$ , hence the image  $\Psi(\mathbb{R}^n)$  is of zero  
 600 measure since  $\mathbb{R}^n$  is a zero measure set of  $\mathbb{R}^m$ . Therefore,  $\Psi(\mathbb{R}^n) \cap \prod_{i=1}^m \mathcal{L}_i$  is zero measure in  $\mathbb{R}^m$ .  
 601 ■

602 Then we have the following result:

603 **Proposition E.7** Suppose that Assumption E.4 and Assumption E.5 hold. Then with probability 1,  
 604 every solution of (E.1) satisfies Assumption E.1.

## 605 E.3 Proof of Lemma E.2 and Theorem E.3

For a set  $\mathcal{S} \subseteq [m]$ , we define

$$M_{\mathcal{S}}(x) = \{J_{SF(x; \ell_{\mathcal{S}})} \quad \mathbf{1}\},$$

606 where  $J_{SF}(x; \ell_{\mathcal{S}}) = ((\Psi_i(x) - \ell_i) \nabla_x \Psi_i(x) \mid i \in \mathcal{S})$ .

607 Similar to the proof of Theorem 3.6, to prove Theorem E.3, we only to prove Lemma E.2. Hence,  
 608 in this section, we only prove Lemma E.2. The proof is similar to the proof of Lemma 4.2. Hence  
 609 we only give the main steps. First, similar to Lemma D.9, we have the following:

**Lemma E.8** If Assumption E.1 holds for Problem (E.1), there exists  $\delta > 0, \gamma > 0$ , such that if

$$\|z\| \leq R(x^0, y^0, z^0),$$

and

$$\max\{\|x - x_+(y, z)\|, \|y - y_+(z)\|, \|x_+(y, z) - z\|\} < \delta,$$

then  $\gamma(M_{\mathcal{T}(y, z)}(x^*(z))) \geq \gamma$  and  $\gamma(M_{\mathcal{T}(y, z)}(x(y_+(z), z))) \geq \gamma$ , where

$$\mathcal{T}(y, z) = \mathcal{T}(x^*(z)) \cup \mathcal{T}(x(y_+(z), z)).$$

**Proof** We prove it by contradiction. Suppose it is not true, there exist  $\{x^k\}, \{y^k\} \subseteq Y$  and  $\{z^k\} \subseteq \mathcal{B}(R(x^0, y^0, z^0))$  such that  $\gamma(M_{\mathcal{T}^k}(x^*(z^k))), \gamma(M_{\mathcal{T}^k}(x(y_+^k(z^k), z^k))) \rightarrow 0$  and

$$\max\{\|x^k - x_+^k(y^k, z^k)\|, \|y^k - y_+^k(z^k)\|, \|x_+^k(y^k, z^k) - z^k\|\} \rightarrow 0,$$

where  $\mathcal{T}^k = \mathcal{T}(x^*(z^k)) \cup \mathcal{T}(x(y_+^k(z^k), z^k))$ . Since  $\mathcal{T}^k$  has only finite choice, without loss of generality, we assume that  $\mathcal{T}^k = \mathcal{T}$  for any  $k$  (passing to a sub-sequence if necessary). By Lemma D.6, there exists a  $\bar{z} \in X^*$  such that  $z^k \rightarrow \bar{z}$ . Hence, by Lemma B.2 and Lemma B.8, we have

$$x^*(z^k) \rightarrow x^*(\bar{z}) = \bar{z}.$$

Therefore by the definition of  $\mathcal{T}(x)$ , when  $k$  is sufficiently large,  $\mathcal{T}(x^*(z^k)) \subseteq \mathcal{T}(x^*(\bar{z})) = \mathcal{T}(\bar{z})$ . Moreover, since  $\|y^k - y_+^k(z^k)\| \rightarrow 0$ , by Lemma B.10, we have

$$\|x(y_+^k(z^k), z^k) - x^*(z^k)\| \rightarrow 0.$$

610 and hence  $\mathcal{T}(x(y_+^k(z^k), z^k)) \subseteq \mathcal{T}(\bar{z})$ . Then  $\mathcal{T}^k \subseteq \mathcal{T}(\bar{z})$  and  $\gamma(M)_{\mathcal{T}^k} = 0$ , which contradicts  
611 Assumption E.1. ■

612 We then can attain a result similar to Lemma D.11.

**Lemma E.9** *If Assumption E.1 holds for (1.2), there exists  $\delta > 0$ , such that if*

$$\|z\| \leq R(x^0, y^0, z^0),$$

and

$$\max\{\|x - x_+(y, z)\|, \|y - y_+(z)\|, \|x_+(y, z) - z\|\} < \delta$$

we have

$$\text{dist}(y_+(z), y(z)) < \lambda \|x^*(z) - x(y_+(z), z)\|$$

613 for some constant  $\lambda > 0$ .

**Proof** By Lemma E.8, we can find a  $\delta > 0$  and a  $\gamma > 0$ , such that if

$$\|z\| \leq R(x^0, y^0, z^0),$$

and

$$\max\{\|x - x_+(y, z)\|, \|y - y_+(z)\|, \|x_+(y, z) - z\|\} < \delta,$$

then  $\gamma(M_{\mathcal{T}(y, z)}(x^*(z))) \geq \gamma$  and  $\gamma(M_{\mathcal{T}(y, z)}(x(y_+(z), z))) \geq \gamma$ , where

$$\mathcal{T}(y, z) = \mathcal{T}(x^*(z)) \cup \mathcal{T}(x(y_+(z), z)).$$

614 Let  $\mathcal{T} = \mathcal{T}(y, z)$ . Then for  $i \notin \mathcal{T}$ ,  $y_i(z) = (y_+(z))_i = 0$  and  $\|y(z) - y_+(z)\| = \|(y(z))_{\mathcal{T}} -$   
615  $(y_+(z))_{\mathcal{T}}\|$ . Using the optimality conditions for  $x(y_+(z), z)$  (D.12) and  $x^*(z)$  (D.17), we have

$$M_{\mathcal{T}}^T(x(y_+(z), z))(y_+(z))_{\mathcal{T}} + \begin{Bmatrix} p(x(y_+(z), z) - z) \\ 0 \end{Bmatrix} = (0, 0, \dots, 0, 1), \quad (\text{E.2})$$

616 and

$$M_{\mathcal{T}}^T(x^*(z))(y(z))_{\mathcal{T}} + \begin{Bmatrix} p(x^*(z) - z) \\ 0 \end{Bmatrix} = (0, 0, \dots, 0, 1). \quad (\text{E.3})$$

617 Note that (E.2) can be written as

$$M_{\mathcal{T}}^T(x^*(z))(y_+(z))_{\mathcal{T}} = M_{\mathcal{T}}^T(x^*(z))(y_+(z))_{\mathcal{T}} - M_{\mathcal{T}}^T(x(y_+(z), z))(y_+(z))_{\mathcal{T}} - \begin{Bmatrix} p(x(y_+(z), z) - z) \\ 0 \end{Bmatrix}. \quad (\text{E.4})$$

By (E.3) and (E.4), we have

$$M_{\mathcal{T}}^T(x^*(z))(y(z) - y_+(z)) = (M_{\mathcal{T}}^T(x(y_+(z), z)) - M_{\mathcal{T}}^T(x^*(z)))(y_+(z))_{\mathcal{T}} - p(x(y_+(z), z) - x^*(z)).$$

618 Therefore, taking norms to the above and the Lemma D.9, we have

$$\begin{aligned} \gamma \|(y_+(z))_{\mathcal{T}} - (y(z))_{\mathcal{T}}\| &\leq \sqrt{m}L \|x(y_+(z), z) - x^*(z)\| \|(y_+(z))_{\mathcal{T}}\| + p \|x(y_+(z), z) - x^*(z)\| \\ &\leq (\sqrt{m}L + p) \|x^*(z) - x(y_+(z), z)\|, \end{aligned}$$

619 where the first inequality uses the Lipschitz-continuity of  $\nabla_x f_i$  and the second is because  $\|y_+(z)\| \leq$   
620 1. Hence, we finish the proof with  $\lambda = (p + \sqrt{m}L)/\gamma$ . ■

621 Then Lemma E.9 and Lemma 4.3 yield Theorem E.3.

#### 622 E.4 Proof of Proposition E.7

For a set  $\mathcal{S} \subseteq [m]$ , we define

$$M_{\mathcal{S}}(x; \ell_{\mathcal{S}}) = \{J_{SF(x; \ell_{\mathcal{S}})} \quad \mathbf{1}\},$$

623 where  $J_{SF}(x; \ell_{\mathcal{S}}) = ((\Psi_i(x) - \ell_i) \nabla_x \Psi_i(x) \mid i \in \mathcal{S})$ .

**Proof** Define the event  $\mathcal{E}_{\mathcal{T}, \mathcal{P}}$  to be: there exists a solution  $(x^*, y^*) \in W^*$ , such that  $M(x^*)$  is not of full row rank,  $\mathcal{T}(x^*) = \mathcal{T}$  and  $\Psi_i(x^*) - \ell_i \geq 0$  for  $i \in \mathcal{P}$  and  $\Psi_i(x^*) - \ell_i$  for  $i \notin \mathcal{P}$ . Then Proposition E.7 is equivalent to the claim:

$$\Pr(\cup_{\mathcal{T} \subseteq [m], \mathcal{P} \subseteq \mathcal{T}} \mathcal{E}_{\mathcal{T}, \mathcal{P}}) = 0.$$

624 Since there are only finite choice of the sets  $\mathcal{T}$  and  $\mathcal{P}$ , we only need to prove that for any  $\mathcal{T} \subseteq [m]$   
 625 and  $\mathcal{P} \subseteq \mathcal{T}$ ,  $\mathcal{E}_{\mathcal{T}, \mathcal{P}}$  holds with probability 0. Without loss of generality, we let  $\mathcal{T} = \{1, 2, \dots, k\}$   
 626 and  $\mathcal{P} = \{1, 2, \dots, p\}$  with  $p \leq k$ . We define  $\delta_i$  for  $i \in [k]$  as  $\delta_i = 1$  for  $i \in \mathcal{P}$  and  $\delta_i = -1$   
 627 otherwise. Then if  $\mathcal{E}_{\mathcal{T}, \mathcal{P}}$  holds, there exists an  $x^* = (x_1^*, \dots, x_n^*)^T \in X^*$  and  $x_{n+1} \in \mathbb{R}$ , such that

- 628 1.  $(x_1^*, \dots, x_n^*)^T \in X^*$ ;
- 629 2.  $x_{n+1}^* \geq 0$ ;
- 630 3.  $\mathcal{T}(x^*) = \mathcal{T}$ ;
- 631 4.  $\Psi_i(x^*) - \ell_i = x_{n+1}^* \geq 0$  for  $i \in \mathcal{P}$  and  $\Psi_i(x^*) - \ell_i = -x_{n+1}^* \leq 0$  for  $i \notin \mathcal{P}$ .
- 632 5.  $M_{\mathcal{T}}(x_1^*, \dots, x_n^*; \ell_1, \dots, \ell_k)$  is row rank deficient.

Define  $\bar{X}_{\mathcal{T}, \mathcal{P}}^*(\ell_1, \dots, \ell_k)$  to be the set of all  $x^* \in X^*$  satisfying the above conditions. Consider the map  $G: \mathbb{R}^{n+1} \rightarrow \mathbb{R}^k$  defined as

$$G(x_1, \dots, x_{n+1}) = (\Psi_1(x_1, \dots, x_n) - \delta_1 x_{n+1}, \dots, \Psi_k(x_1, \dots, x_n) - \delta_k x_{n+1})^T.$$

633 Then  $G(x_1^*, \dots, x_{n+1}^*) = (\ell_1, \dots, \ell_k)$  for any  $(x_1^*, \dots, x_{n+1}^*)^T \in \bar{X}_{\mathcal{T}, \mathcal{P}}^*(\ell_1, \dots, \ell_k)$ . Define the  
 634 set  $\bar{X}_{\mathcal{T}, \mathcal{P}} \subseteq \mathbb{R}^{n+1}$  be the collection of all  $(x_1, \dots, x_{n+1})$  satisfying:

- 635 1.  $x_{n+1} > 0$ .
- 636 2. there exist  $\bar{\ell}_1, \dots, \bar{\ell}_k$  with  $\Psi_i(x_1, \dots, x_n) - \bar{\ell}_i = x_{n+1}$  for  $i \in \mathcal{P}$  and  $\Psi_i(x_1, \dots, x_n) -$   
 637  $\bar{\ell}_i = -x_{n+1}$  for  $i \notin \mathcal{P}$ .
- 638 3.  $M_{\mathcal{T}}(x_1, \dots, x_n; \bar{\ell}_1, \dots, \bar{\ell}_k)$  is rank deficient.
- 639 4.  $(\bar{\ell}_1, \dots, \bar{\ell}_k)^T \in \prod_{i=1}^k \mathcal{L}_i$ .

Therefore, if  $\mathcal{E}_{\mathcal{T}, \mathcal{P}}$  holds, we have

$$(\ell_1, \dots, \ell_m)^T \in (G(\bar{X}_{\mathcal{T}, \mathcal{P}}) \cap \prod_{i=1}^k \mathcal{L}_i) \times \prod_{i=k+1}^m \mathcal{L}_i \cup \Omega.$$

640 For  $(x_1, \dots, x_{n+1})^T \in \bar{X}_{\mathcal{T}, \mathcal{P}}$ , notice that  $JG(x_1, \dots, x_{n+1})$  is attained by doing elemen-  
 641 tary matrix transformation to the matrix  $M_{\mathcal{T}}(x_1, \dots, x_n; \bar{\ell}_1, \dots, \bar{\ell}_k)$ , i.e., multiplying the first  
 642  $k$  columns of  $M_{\mathcal{T}}(x_1, \dots, x_n; \bar{\ell}_1, \dots, \bar{\ell}_k)$  by  $1/x_{n+1}$  and multiplying the  $k+1$ -th column of  
 643  $M_{\mathcal{T}}(x_1, \dots, x_n; \bar{\ell}_1, \dots, \bar{\ell}_k)$  by  $-1$  and then multiplying the  $i$ -th row by  $\delta_i$  for  $i \in [n]$ . There-  
 644 fore,  $M_{\mathcal{T}}(x_1, \dots, x_n; \bar{\ell}_1, \dots, \bar{\ell}_k)$  is also rank deficient.

Consequently,  $G(x_1, \dots, x_{n+1})$  with  $(x_1, \dots, x_{n+1})^T \in \bar{X}_{\mathcal{T}, \mathcal{P}}$  is a critic value of  $G$  (see [40]). Then by Sard's Theorem [40],  $G(\bar{X}_{\mathcal{T}, \mathcal{P}})$  is a zero measure set in  $\mathbb{R}^k$ . Hence,  $G(\bar{X}_{\mathcal{T}, \mathcal{P}}) \cap \prod_{i=1}^k \mathcal{L}_i$  is a zero measure set in  $\prod_{i=1}^k \mathcal{L}_i$ . Recall that if  $\mathcal{E}_{\mathcal{T}, \mathcal{P}}$  holds, we have

$$(\ell_1, \dots, \ell_m)^T \in \mathcal{Z} = (G(\bar{X}_{\mathcal{T}, \mathcal{P}}) \cap \prod_{i=1}^k \mathcal{L}_i) \times \prod_{i=k+1}^m \mathcal{L}_i \cup \Omega.$$

645 By the above analysis,  $G(\bar{X}_{\mathcal{T}, \mathcal{P}}) \cap \prod_{i=1}^k \mathcal{L}_i$  is a zero measure set in  $\prod_{i=1}^k \mathcal{L}_i$ . Hence,  $(G(\bar{X}_{\mathcal{T}, \mathcal{P}}) \cap$   
 646  $\prod_{i=1}^k \mathcal{L}_i) \times \prod_{i=k+1}^m \mathcal{L}_i$  is a zero measure set in  $\prod_{i=1}^m \mathcal{L}_i$ . Also by Assumption E.5,  $\Omega$  is a zero  
 647 measure set in  $\prod_{i=1}^m \mathcal{L}_i$ . Consequently,  $\mathcal{Z}$  is a zero measure set in  $\prod_{i=1}^m \mathcal{L}_i$ . Then by the continuity  
 648 of the distribution of  $\ell$ , we finish the proof. ■

## F Details in Experiments

Recall the procedure of training a robust neural network against adversarial attacks can be formulated as a min-max problem:

$$\min_{\mathbf{w}} \sum_{i=1}^N \max_{\delta_i, \text{ s.t. } \|\delta_i\|_{\infty} \leq \varepsilon} \ell(f(x_i + \delta_i; \mathbf{w}), y_i), \quad (\text{F.1})$$

where  $\mathbf{w}$  is the parameter of the neural network, the pair  $(x_i, y_i)$  denotes the  $i$ -th data point, and  $\delta_i$  is the perturbation added to data point  $i$ .

As (F.1) is nonconvex-nonconcave and thus difficult to solve directly, researchers introduce an approximation of (F.1) [20] where the approximated problem has a concave inner problem. The approximation is first replacing the inner maximization problem in F.1 with a finite max problem:

$$\min_{\mathbf{w}} \sum_{i=1}^N \max \{ \ell(f(\hat{x}_{i0}(\mathbf{w}); \mathbf{w}), y_i), \dots, \ell(f(\hat{x}_{i9}(\mathbf{w}); \mathbf{w}), y_i) \}, \quad (\text{F.2})$$

where each  $\hat{x}_{ij}(\mathbf{w})$  is the result of a targeted attack on sample  $x_i$  by changing the output of the network to label  $j$ .

To obtain the targeted attack  $\hat{x}_{ij}(\mathbf{w})$ , we need to introduce an additional procedure. Recall the images in MNIST have 10 classifications, thus the last layer of the neural network architecture for learning classification have 10 different neurons. To obtain any targeted attack  $\hat{x}_{ij}(\mathbf{w})$ , we perform gradient ascent for  $K$  times:

$$x_{ij}^{k+1} = \text{Proj}_{B(x, \varepsilon)} \left[ x_{ij}^k + \alpha \nabla_x (Z_j(x_{ij}^k, \mathbf{w}) - Z_{y_i}(x_{ij}^k, \mathbf{w})) \right], \quad k = 0, \dots, K-1,$$

and let  $\hat{x}_{ij}(\mathbf{w}) = x_{ij}^K$ . Here,  $Z_j$  is the network logit before softmax corresponding to label  $j$ ;  $\alpha > 0$  is the step-size; and  $\text{Proj}_{B(x, \varepsilon)}[\cdot]$  is the projection to the infinity ball with radius  $\varepsilon$  centered at  $x$ . Using the same setting in [20], we set the iteration number as  $K = 40$ , the stepsize as  $\alpha = 0.01$ , and the perturbation level  $\varepsilon$  chosen from  $\{0.0, 0.1, 0.2, 0.3, 0.4\}$ .

Now we can replace the finite max problem (F.2) with a concave problem over a probabilistic simplex, where the entire problem is non-convex in  $\mathbf{w}$ , but concave in  $\mathbf{t}$ :

$$\min_{\mathbf{w}} \sum_{i=1}^N \max_{\mathbf{t} \in \mathcal{T}} \sum_{j=0}^9 t_j \ell(f(x_{ij}^K; \mathbf{w}), y_i), \quad \mathcal{T} = \{(t_1, \dots, t_m) \mid \sum_{i=1}^m t_i = 1, t_i \geq 0\}. \quad (\text{F.3})$$

We use Convolutional Neural Network(CNN) with the architecture detailed in Table 3 in the experiments. This setting is the same as in [20].

| Layer Type             | Shape                  |
|------------------------|------------------------|
| Convolution + ReLU     | $5 \times 5 \times 20$ |
| Max Pooling            | $2 \times 2$           |
| Convolution + ReLU     | $5 \times 5 \times 50$ |
| Max Pooling            | $2 \times 2$           |
| Fully Connected + ReLU | 800                    |
| Fully Connected + ReLU | 500                    |
| Softmax                | 10                     |

**Table 3:** Model Architecture for the MNIST dataset.

The results are listed in Table 2. The first three lines are the results obtained from [20] and the fourth line is obtained by using the code provided in [20] to train their algorithm. As for comparison, we run our algorithm 2 for the same number of iterations (100 iterations) with parameter  $p = 0.2, \beta = 0.8$  and  $\alpha = 0.5$ . In the experiment, to compute the projection of a vector of dimension  $d$  over the probability simplex, we use the algorithm from [41] which has a complexity  $\mathcal{O}(d \log d)$ .

## References

- [1] I. Goodfellow, J. Pouget-Abadie, M. Mirza, B. Xu, D. Warde-Farley, S. Ozair, A. Courville, and Y. Bengio, “Generative adversarial nets,” in *Advances in neural information processing systems*, pp. 2672–2680, 2014.
- [2] M. Arjovsky, S. Chintala, and L. Bottou, “Wasserstein gan,” *arXiv preprint arXiv:1701.07875*, 2017.
- [3] A. Madry, A. Makelov, L. Schmidt, D. Tsipras, and A. Vladu, “Towards deep learning models resistant to adversarial attacks,” *arXiv preprint arXiv:1706.06083*, 2017.
- [4] A. Ben-Tal, L. El Ghaoui, and A. Nemirovski, *Robust optimization*, vol. 28. Princeton University Press, 2009.
- [5] E. Delage and Y. Ye, “Distributionally robust optimization under moment uncertainty with application to data-driven problems,” *Operations research*, vol. 58, no. 3, pp. 595–612, 2010.
- [6] H. Namkoong and J. C. Duchi, “Stochastic gradient methods for distributionally robust optimization with f-divergences,” in *Advances in neural information processing systems*, pp. 2208–2216, 2016.
- [7] H. Namkoong and J. C. Duchi, “Variance-based regularization with convex objectives,” in *Advances in neural information processing systems*, pp. 2971–2980, 2017.
- [8] Y. Zhang and L. Xiao, “Stochastic primal-dual coordinate method for regularized empirical risk minimization,” *The Journal of Machine Learning Research*, vol. 18, no. 1, pp. 2939–2980, 2017.
- [9] C. Tan, T. Zhang, S. Ma, and J. Liu, “Stochastic primal-dual method for empirical risk minimization with  $\mathcal{O}(1)$  per-iteration complexity,” in *Advances in Neural Information Processing Systems*, pp. 8366–8375, 2018.
- [10] S. S. Du, J. Chen, L. Li, L. Xiao, and D. Zhou, “Stochastic variance reduction methods for policy evaluation,” in *Proceedings of the 34th International Conference on Machine Learning-Volume 70*, pp. 1049–1058, JMLR. org, 2017.
- [11] B. Dai, A. Shaw, L. Li, L. Xiao, N. He, Z. Liu, J. Chen, and L. Song, “Sbeed: Convergent reinforcement learning with nonlinear function approximation,” *arXiv preprint arXiv:1712.10285*, 2017.
- [12] A. Nemirovski, “Prox-method with rate of convergence  $\mathcal{O}(1/t)$  for variational inequalities with lipschitz continuous monotone operators and smooth convex-concave saddle point problems,” *SIAM Journal on Optimization*, vol. 15, no. 1, pp. 229–251, 2004.
- [13] Y. Nesterov, “Dual extrapolation and its applications to solving variational inequalities and related problems,” *Mathematical Programming*, vol. 109, no. 2-3, pp. 319–344, 2007.
- [14] R. D. Monteiro and B. F. Svaiter, “On the complexity of the hybrid proximal extragradient method for the iterates and the ergodic mean,” *SIAM Journal on Optimization*, vol. 20, no. 6, pp. 2755–2787, 2010.
- [15] B. Palaniappan and F. Bach, “Stochastic variance reduction methods for saddle-point problems,” in *Advances in Neural Information Processing Systems*, pp. 1416–1424, 2016.
- [16] G. Gidel, T. Jebara, and S. Lacoste-Julien, “Frank-wolfe algorithms for saddle point problems,” *arXiv preprint arXiv:1610.07797*, 2016.
- [17] P. Mertikopoulos, B. Lecouat, H. Zenati, C.-S. Foo, V. Chandrasekhar, and G. Piliouras, “Optimistic mirror descent in saddle-point problems: Going the extra (gradient) mile,” *arXiv preprint arXiv:1807.02629*, 2018.
- [18] E. Y. Hamedani, A. Jalilzadeh, N. Aybat, and U. Shanbhag, “Iteration complexity of randomized primal-dual methods for convex-concave saddle point problems,” *arXiv preprint arXiv:1806.04118*, 2018.
- [19] A. Mokhtari, A. Ozdaglar, and S. Pattathil, “A unified analysis of extra-gradient and optimistic gradient methods for saddle point problems: Proximal point approach,” *arXiv preprint arXiv:1901.08511*, 2019.

- [20] M. Nouiehed, M. Sanjabi, T. Huang, J. D. Lee, and M. Razaviyayn, “Solving a class of non-convex min-max games using iterative first order methods,” in *Advances in Neural Information Processing Systems*, pp. 14905–14916, 2019.
- [21] L. Collins, A. Mokhtari, and S. Shakkottai, “Distribution-agnostic model-agnostic meta-learning,” *arXiv preprint arXiv:2002.04766*, 2020.
- [22] D. M. Ostrovskii, A. Lowy, and M. Razaviyayn, “Efficient search of first-order nash equilibria in nonconvex-concave smooth min-max problems,” *arXiv preprint arXiv:2002.07919*, 2020.
- [23] T. Lin, C. Jin, M. Jordan, *et al.*, “Near-optimal algorithms for minimax optimization,” *arXiv preprint arXiv:2002.02417*, 2020.
- [24] S. Lu, I. Tsaknakis, M. Hong, and Y. Chen, “Hybrid block successive approximation for one-sided non-convex min-max problems: algorithms and applications,” *arXiv preprint arXiv:1902.08294*, 2019.
- [25] K. K. Thekumparampil, P. Jain, P. Netrapalli, and S. Oh, “Efficient algorithms for smooth minimax optimization,” in *Advances in Neural Information Processing Systems*, pp. 12659–12670, 2019.
- [26] C. Jin, P. Netrapalli, and M. I. Jordan, “Minmax optimization: Stable limit points of gradient descent ascent are locally optimal,” *arXiv preprint arXiv:1902.00618*, 2019.
- [27] H. Rafique, M. Liu, Q. Lin, and T. Yang, “Non-convex min-max optimization: Provable algorithms and applications in machine learning,” *arXiv preprint arXiv:1810.02060*, 2018.
- [28] T. Lin, C. Jin, and M. I. Jordan, “On gradient descent ascent for nonconvex-concave minimax problems,” *arXiv preprint arXiv:1906.00331*, 2019.
- [29] J. Zhang and Z.-Q. Luo, “A proximal alternating direction method of multiplier for linearly constrained nonconvex minimization,” *arXiv preprint arXiv:1812.10229*, 2018.
- [30] A. Kurakin, I. Goodfellow, and S. Bengio, “Adversarial machine learning at scale,” *arXiv preprint arXiv:1611.01236*, 2016.
- [31] I. J. Goodfellow, J. Shlens, and C. Szegedy, “Explaining and harnessing adversarial examples,” *arXiv preprint arXiv:1412.6572*, 2014.
- [32] M. Hardt, E. Price, and N. Srebro, “Equality of opportunity in supervised learning,” in *Advances in neural information processing systems*, pp. 3315–3323, 2016.
- [33] C. Dwork, M. Hardt, T. Pitassi, O. Reingold, and R. Zemel, “Fairness through awareness,” in *Proceedings of the 3rd innovations in theoretical computer science conference*, pp. 214–226, 2012.
- [34] M. Mohri, G. Sivek, and A. T. Suresh, “Agnostic federated learning,” *arXiv preprint arXiv:1902.00146*, 2019.
- [35] C. Finn, P. Abbeel, and S. Levine, “Model-agnostic meta-learning for fast adaptation of deep networks,” in *Proceedings of the 34th International Conference on Machine Learning-Volume 70*, pp. 1126–1135, JMLR. org, 2017.
- [36] P. T. Harker and J.-S. Pang, “Finite-dimensional variational inequality and nonlinear complementarity problems: a survey of theory, algorithms and applications,” *Mathematical programming*, vol. 48, no. 1-3, pp. 161–220, 1990.
- [37] F. Facchinei and J.-S. Pang, *Finite-dimensional variational inequalities and complementarity problems*. Springer Science & Business Media, 2007.
- [38] H. Zhang, Y. Yu, J. Jiao, E. P. Xing, L. E. Ghaoui, and M. I. Jordan, “Theoretically principled trade-off between robustness and accuracy,” *arXiv preprint arXiv:1901.08573*, 2019.
- [39] D. P. Bertsekas, *Convex optimization theory*.
- [40] M. Berger and B. Gostiaux, *Differential Geometry: Manifolds, Curves, and Surfaces: Manifolds, Curves, and Surfaces*, vol. 115. Springer Science & Business Media, 2012.
- [41] W. Wang and M. A. Carreira-Perpinán, “Projection onto the probability simplex: An efficient algorithm with a simple proof, and an application,” *arXiv preprint arXiv:1309.1541*, 2013.
